# Supplementary material
Source: PubMed Central journal article supplement (PMC2830394)
Supplement: NIHMS177153-supplement-2_si_002.pdf [file NIHMS177153-supplement-2_si_002.pdf]

# Supporting Information

## **Enantioselective Carbonyl Allylation, Crotylation and *tert*-Prenylation of Furan Methanols and Furfurals via Iridium Catalyzed Transfer Hydrogenation**

Benjamin Bechem,<sup>a,b</sup> Ryan L. Patman,<sup>b</sup> Stephen Hashmi<sup>a\*</sup> and Michael J. Krische<sup>b\*</sup>

*<sup>a</sup>Organisch-Chemisches Institut  
Ruprecht-Karls-Universität Heidelberg,  
D-69120 Heidelberg, Germany*

*<sup>b</sup>University of Texas at Austin  
Department of Chemistry and Biochemistry  
Austin, TX 78712, USA*

E-mail: [hashmi@hashmi.de](mailto:hashmi@hashmi.de), [mkrische@mail.utexas.edu](mailto:mkrische@mail.utexas.edu)

### Table of Contents

|                                                                                   |    |
|-----------------------------------------------------------------------------------|----|
| General Experimental Details                                                      | 2  |
| General Experimental Procedures                                                   | 3  |
| Experimental Procedure for the Preparation of Iridium Complex <b>(R)-I</b>        | 5  |
| Experimental Procedure for the Preparation of Alcohol <b>1c</b>                   | 6  |
| Detailed Experimental Procedures and Spectroscopic Data for Adducts <b>3a-3c</b>  | 8  |
| Detailed Experimental Procedures and Spectroscopic Data for Adducts <b>4a-4c</b>  | 17 |
| Detailed Experimental Procedures and Spectroscopic Data for Adducts <b>5a-5c</b>  | 26 |
| Detailed Experimental Procedures and Spectroscopic Data for Products <b>6a-6c</b> | 35 |

**General Experimental Details.** All reactions were run under an atmosphere of argon, unless otherwise indicated. Anhydrous solvents were transferred *via* oven-dried syringe. Reaction tubes were flame-dried and cooled under a stream of argon. Commercially available metal salts, ligands and alcohols were used as received. Commercially available aldehydes were purified *via* distillation or recrystallization prior to use. Reactions were monitored by thin-layer chromatography and products were visualized with anisaldehyde stain. Analytical thin-layer chromatography (TLC) was carried out using 0.2-mm commercial silica gel plates. Preparative column chromatography employing silica gel was performed according to the method of Still.<sup>1</sup> Solvents for chromatography are listed as volume/volume ratios. High-resolution mass spectra (HRMS) are reported as *m/z* (relative intensity). Accurate masses are reported for the molecular ion [M+H]<sup>+</sup> or a suitable fragment ion. Proton nuclear magnetic resonance (<sup>1</sup>H NMR) spectra were recorded with on a 400 MHz spectrometer. Chemical shifts are reported in delta (δ) units, parts per million (ppm) relative to residual CHCl<sub>3</sub> at 7.24 ppm. Coupling constants are reported in Hertz (Hz). Carbon-13 nuclear magnetic resonance (<sup>13</sup>C NMR) spectra were recorded on a 100 MHz spectrometer. Chemical shifts are reported in delta (δ) units, ppm relative to the center of the triplet at 77.0 ppm for deuteriochloroform. <sup>13</sup>C NMR spectra were routinely run with broadband decoupling. Compound numbers used in the experimental section correspond to those employed in the main paper.

---

<sup>1</sup> W. C. Still, M. Kahn, A. Mitra, *J. Org. Chem.* **1978**, *43*, 2923-2925.

## **General Experimental Procedures for Adducts 3a-3c**

### **General Procedure A for the Preparation of Adducts 3a-3c from Furan Methanols**

**1a-1c:** To a flame dried re-sealable reaction tube purged with argon and containing a magnetic stirrer, was added [Ir(cod)Cl]<sub>2</sub> (6.7 mg, 0.010 mmol, 2.5 mol%), (*R*)-Cl<sub>2</sub>MeO-BIPHEP (13.0 mg, 0.020 mmol, 5 mol%), 3-nitro-4-chlorobenzoic acid (8.1 mg, 0.040 mmol 10 mol%), Cs<sub>2</sub>CO<sub>3</sub> (26.1 mg, 0.080 mmol, 20 mol%) and the furan methanol (0.40 mmol, 100 mol%). THF (2.0 mL, 0.2 M concentration with respect to the furan methanol) and allyl acetate (86 μL, 0.80 mmol, 200 mol%) were added and the reaction mixture was allowed to stir at 100 °C for 24 hours. The reaction mixture was concentrated *in vacuo* and purified by flash column chromatography (SiO<sub>2</sub>) to furnish the corresponding products of allylation **3a-3c**.

### **General Procedure B for the Preparation of Adducts 3a-3c from Furfurals 2a-2c:**

To a flame dried re-sealable reaction tube purged with argon and containing a magnetic stirrer, was added [Ir(cod)Cl]<sub>2</sub> (6.7 mg, 0.010 mmol, 2.5 mol%), (*R*)-Cl<sub>2</sub>MeO-BIPHEP (13.0 mg, 0.020 mmol, 5 mol%), 3-nitro-4-chlorobenzoic acid (8.1 mg, 0.040 mmol 10 mol%), Cs<sub>2</sub>CO<sub>3</sub> (26.1 mg, 0.080 mmol, 20 mol%) and the furfural (0.40 mmol, 100 mol%). THF (2.0 mL, 0.2 M concentration with respect to the furfural), *i*-PrOH (61 μL, 0.80 mmol, 200 mol%) and allyl acetate (86 μL, 0.80 mmol, 200 mol%) were added and the reaction mixture was allowed to stir at 100 °C for 24 hours. The reaction mixture was concentrated *in vacuo* and purified by flash column chromatography (SiO<sub>2</sub>) to furnish the corresponding products of allylation **3a-3c**.

## **General Experimental Procedures for Adducts 4a-4c**

### **General Procedure C for the Preparation of Adducts 4a-4c from Furan Methanols**

**1a-1c:** To a flame dried re-sealable reaction tube purged with argon and containing a magnetic stirrer, was added (*R*)-Ir-complex I (20.4 mg, 0.020 mmol, 5 mol%), K<sub>3</sub>PO<sub>4</sub> (84.9 mg, 0.40 mmol, 100 mol%), and the corresponding furan methanol (0.40 mmol, 100 mol%). THF (0.2 mL, 2 M concentration with respect to the alcohol), H<sub>2</sub>O (36 μL, 2.0 mmol, 500 mol%) and α-methyl allyl acetate (86 μL, 0.80 mmol, 200 mol%) were added and the reaction mixture was allowed to stir at 70 °C for 48 hours. The reaction mixture was concentrated *in vacuo* and purified by flash column chromatography (SiO<sub>2</sub>) to furnish the corresponding products of crotylation **4a-4c**.

### **General Procedure D for the Preparation of Adducts 4a-4c from Furfurals 2a-2c:**

To a flame dried re-sealable reaction tube purged with argon and containing a magnetic stirrer, was added (*R*)-Ir-complex I (20.4 mg, 0.020 mmol, 5 mol%), K<sub>3</sub>PO<sub>4</sub> (84.9 mg, 0.400 mmol, 100 mol%), and the corresponding furfural (0.40 mmol, 100 mol%). THF (0.2 mL, 2 M concentration with respect to the aldehyde), H<sub>2</sub>O (36 μL, 2.0 mmol, 500 mol%), *i*-PrOH (61 μL, 0.80 mmol, 200 mol%) and α-methyl allyl acetate (86 μL, 0.80 mmol, 200 mol%) were added and the reaction mixture was allowed to stir at 70 °C for 48 hours. The reaction mixture was concentrated *in vacuo* and purified by flash column chromatography (SiO<sub>2</sub>), under the conditions noted, to furnish the corresponding products of crotylation **4a-4c**.

## **General Experimental Procedures for Adducts 5a-5c**

### **General Procedure E for the Preparation of Adducts 5a-5c from Furan Methanols**

**1a-1c:** To a flame dried re-sealable reaction tube purged with nitrogen and containing a magnetic stirrer, was added (*R*)-Ir-complex II (5 mol%) and the corresponding furan methanol (100 mol%). Toluene (1 M concentration with respect to the alcohol), 1,1-dimethylallene (200 mol%), and propionaldehyde (5 mol%) were added and the reaction mixture was allowed to stir at 40 °C for 72 hours. The reaction mixture was concentrated *in vacuo* and purified by flash column chromatography (SiO<sub>2</sub>) to furnish the corresponding products of *tert*-prenylation **5a-5c**.

### **General Procedure F for the Preparation of Adducts 5a-5c from Furfurals 2a-2c:**

To a flame dried re-sealable reaction tube purged with nitrogen and containing a magnetic stirrer, was added (*R*)-Ir-complex II (5 mol%) and the corresponding furfural (100 mol%). Toluene (1 M concentration with respect to the aldehyde), 1,1-dimethylallene (200 mol%), and *i*-PrOH (200 mol%) were added and the reaction mixture was allowed to stir at 40 °C for 72 hours. The reaction mixture was concentrated *in vacuo* and purified by flash column chromatography (SiO<sub>2</sub>) to furnish the corresponding products of *tert*-prenylation **5a-5c**.

## **General Experimental Procedure for Rearrangement Products 6a-6c**

### **General Procedure for the Achmatowicz Rearrangement of Adducts 3b, 4b, and 5b:**

Alcohols **3b**, **4b** or **5b** (100 mol%) were dissolved in aqueous THF (THF:H<sub>2</sub>O, 4:1, 0.1 M) and the solution was cooled to 0 °C. N-bromosuccinimide (100 mol%) was added portion-wise while maintaining a temperature of 0 °C. After the reaction had gone to completion as determined by TLC analysis, the reaction mixture was diluted with dichloromethane and washed with KI (10% aqueous solution), Na<sub>2</sub>S<sub>2</sub>O<sub>4</sub> (15% aqueous solution), and NaHCO<sub>3</sub> (10% aqueous solution), and brine. The organic layer was dried (MgSO<sub>4</sub>), filtered and concentrated *in vacuo*. The crude residue was purified by flash column chromatography (SiO<sub>2</sub>) to furnish the corresponding pyrones **6a**, **6b** or **6c**, respectively.



**[5-(3-chloro-4-methoxyphenyl)furan-2-yl]methanol (1c)**

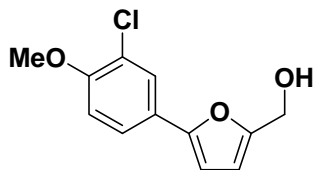

To a solution of 5-(3-chloro-4-methoxyphenyl)furfural (1.00 g, 4.22 mmol, 100 mol%), in neat methanol (40 mL) at 0 °C, was added sodium borohydride (176 mg, 4.65 mmol, 1.1eq.) in small portions with stirring. After evolution of hydrogen ceased, the reaction mixture was a saturated solution of aqueous NH<sub>4</sub>Cl was added. The resulting mixture was extracted with dichloromethane and the combined organic extracts were washed with brine, dried (MgSO<sub>4</sub>) and concentrated *in vacuo*. The crude product was purified by flash column chromatography (SiO<sub>2</sub>: hexane:EtOAc, 3:1) to furnish the title compound (945 mg, 94% yield) as a colorless solid.<sup>3</sup>

**Mp** = 86 °C.

**TLC** (SiO<sub>2</sub>): R<sub>f</sub> (Hexane:Et<sub>2</sub>O, 3:1) = 0.13.

**<sup>1</sup>H NMR** (400 MHz, CDCl<sub>3</sub>): 7.66 (s, 1H), 7.49 (d, *J* = 8.7 Hz, 1H), 6.90 (d, *J* = 8.6 Hz, 1H), 6.46 (d, *J* = 3.3 Hz, 1H), 6.33 (d, *J* = 3.1 Hz, 1H), 4.63 (s, 2H), 3.90 (s, 3H), 1.88 (s, 1H).

**<sup>13</sup>C NMR** (100 MHz, CDCl<sub>3</sub>): = 56.4, 57.7, 105.2, 110.2, 112.3, 123.0, 123.4, 124.7, 126.0, 152.8, 153.6, 154.5, 154.5, 153.6, 152.9, 126.0, 124.7, 123.5, 123.0, 112.4, 110.3, 105.2, 57.8, 56.4.

**HRMS** (CI): Calcd. for C<sub>12</sub>H<sub>11</sub>O<sub>3</sub><sup>35</sup>Cl (M)<sup>+</sup>: 238.0397, Found: 238.0398.

**FTIR** (neat): 3359, 2940, 2839, 1548, 1489, 1461, 1440, 1267, 1062, 1006, 811, 731, 707 cm<sup>-1</sup>.

<sup>3</sup> K. Ziach, J. Jurczak, *Org. Lett.* **2008**, 10, 5159–5162.

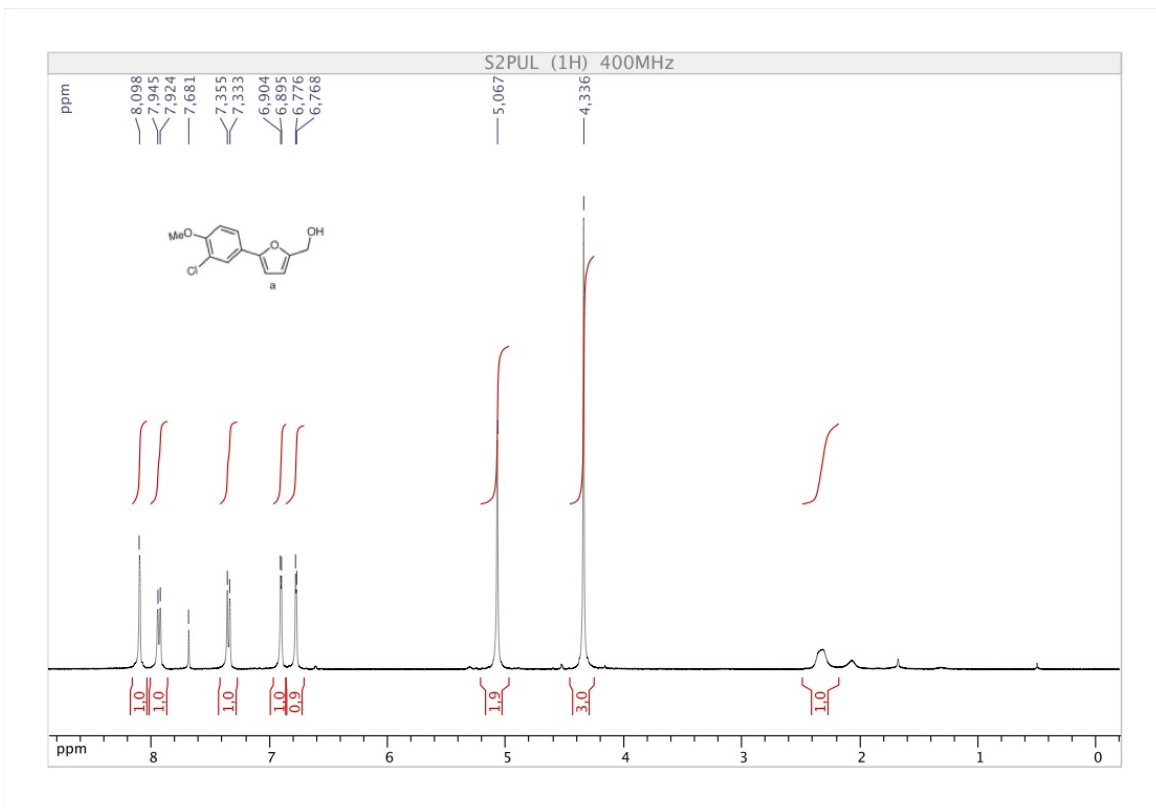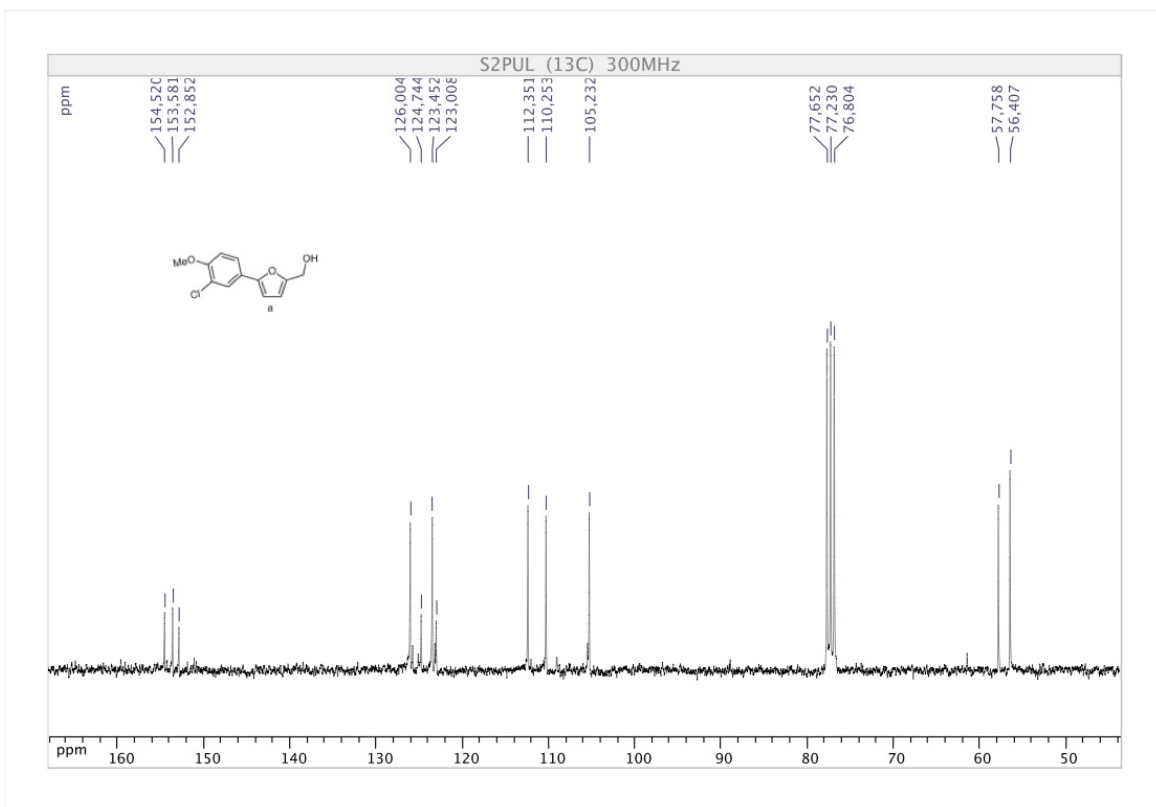

**(R)-1-(furan-2-yl)but-3-en-1-ol (3a)**

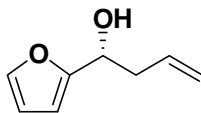

**Procedure A (via alcohol 1a):** The reaction mixture was concentrated *in vacuo* and purified by flash column chromatography (SiO<sub>2</sub>: pentane:Et<sub>2</sub>O, 5:1) to furnish the title compound (37.5 mg, 68% yield, 94% ee) as a colorless oil.

**Procedure B (via aldehyde 2a):** The mixture was concentrated *in vacuo* and purified by flash column chromatography (SiO<sub>2</sub>: pentane:Et<sub>2</sub>O, 5:1) to furnish the title compound (45.7 mg, 83% yield, 96% ee) as a colorless oil.

**TLC** (SiO<sub>2</sub>): R<sub>f</sub> (Hexane: Et<sub>2</sub>O, 5:1) = 0.17.

**<sup>1</sup>H NMR** (400 MHz, CDCl<sub>3</sub>): 7.35 (d, *J* = 1.8 Hz, 1H), 6.31 (dd, *J* = 3.2, 1.8 Hz, 1H), 6.23 (d, *J* = 3.3 Hz, 1H), 5.78 (tdd, *J* = 17.1, 10.2, 7.1 Hz, 1H), 5.14 (m, 2H), 4.72 (t, *J* = 6.2 Hz, 1H), 2.60 (m, 2H), 2.16 (s, 1H).

**<sup>13</sup>C NMR** (100 MHz, CDCl<sub>3</sub>): 156.2, 142.2, 133.9, 118.8, 110.3, 106.3, 67.1, 40.3.

**HRMS** (CI): Calcd. for C<sub>8</sub>H<sub>9</sub>O<sub>2</sub> (M-H)<sup>+</sup>: 138.0603, Found: 138.0604.

**FTIR** (neat): 3363, 3078, 2913, 1150, 1010, 918 cm<sup>-1</sup>.

**Opt. Rot.** [α]<sub>D</sub><sup>26</sup> = +30.5 (c = 0.688, in CHCl<sub>3</sub>) for 93% ee (*R*)-**3a**, Lit.<sup>4</sup> [α]<sub>D</sub><sup>26</sup> +24.9 (c = 1.0, CHCl<sub>3</sub>) for 83% ee (*R*)-**3a**.

**HPLC** (Chiralcel AD-H column, Hexane:*i*-PrOH, 99.5:0.5, 0.5 mL/min, 210 nm): t<sub>minor</sub> = 52.1 min, t<sub>major</sub> = 55.0 min.

*The spectroscopic properties of this compound are consistent with the data available in the literature.*<sup>4</sup>

<sup>4</sup> S. E. Denmark, J. Fu, M. J. Lawler, *J. Org. Chem.* **2006**, *71*, 1523–1536.



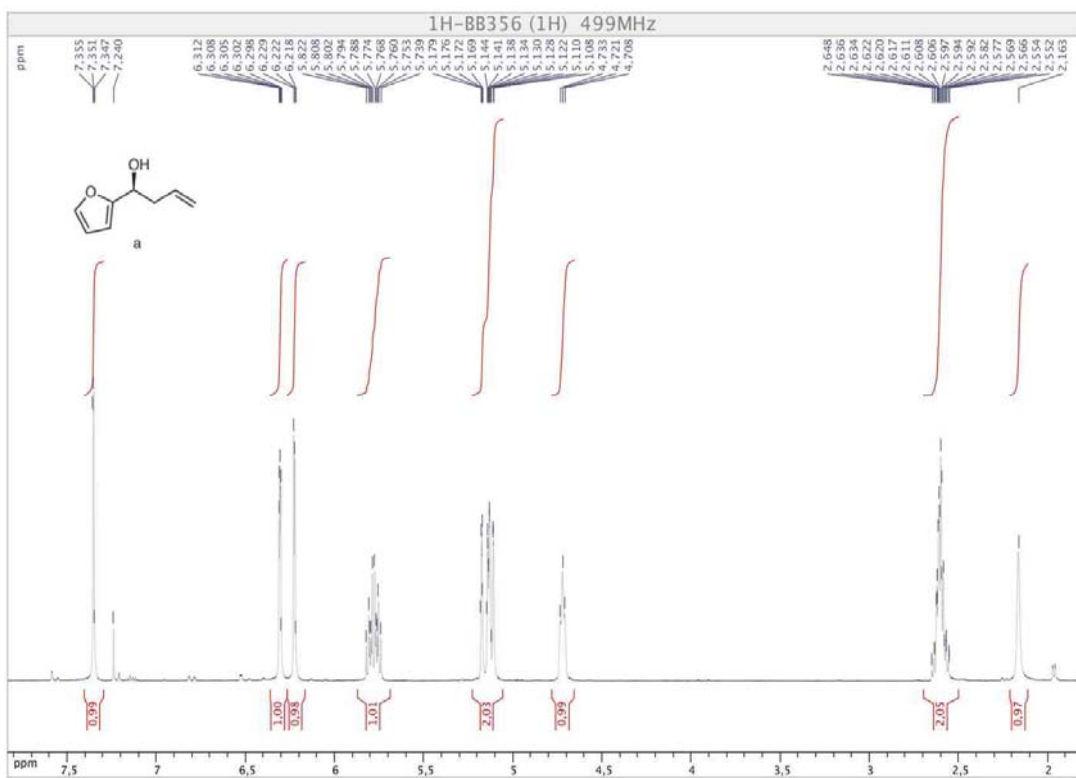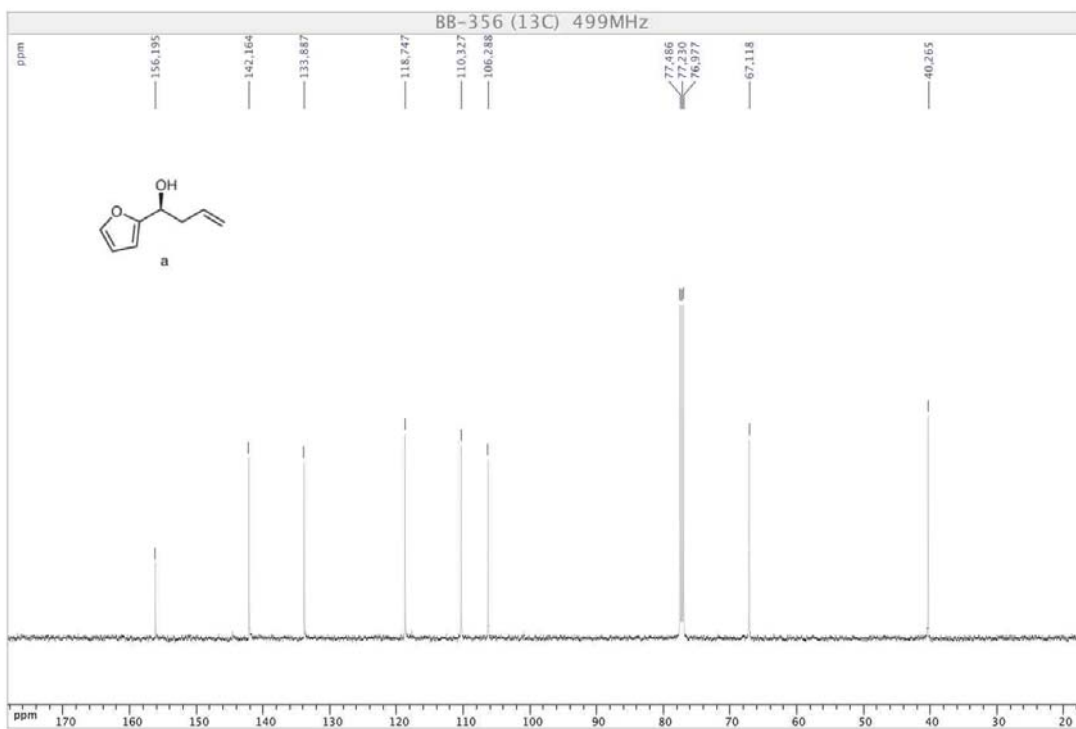

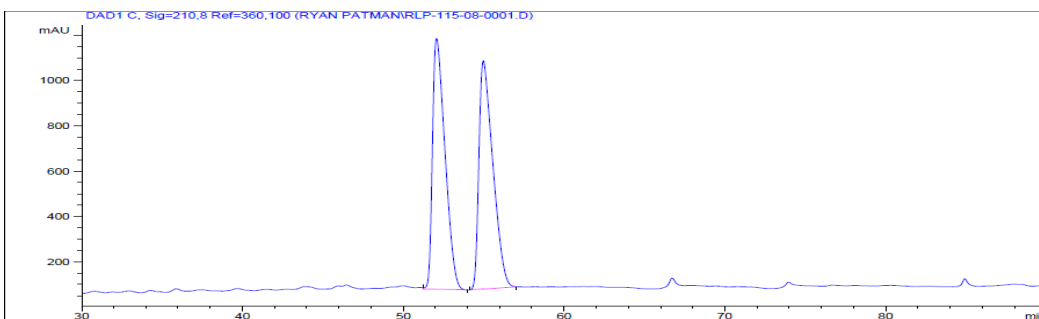

| Peak # | RetTime [min] | Type | Width [min] | Area [mAU*s] | Height [mAU] | Area %  |
|--------|---------------|------|-------------|--------------|--------------|---------|
| 1      | 52.059        | VB   | 0.8288      | 5.99203e4    | 1108.16455   | 49.6834 |
| 2      | 54.967        | BB   | 0.9061      | 6.06840e4    | 1008.36591   | 50.3166 |

From the alcohol oxidation level:

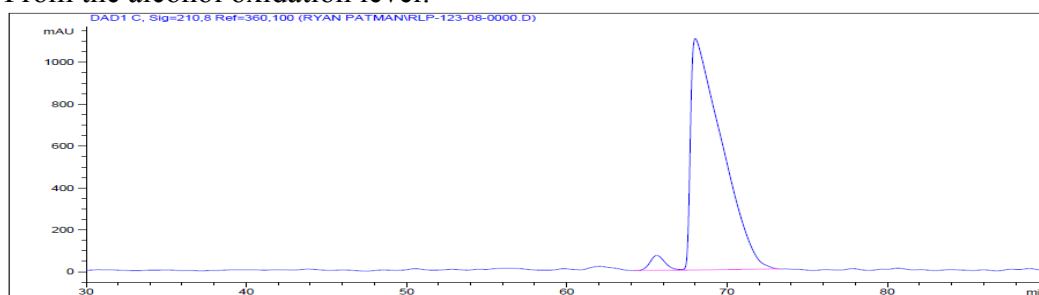

| Peak # | RetTime [min] | Type | Width [min] | Area [mAU*s] | Height [mAU] | Area %  |
|--------|---------------|------|-------------|--------------|--------------|---------|
| 1      | 65.597        | VV   | 0.9974      | 4686.07520   | 71.61896     | 3.0493  |
| 2      | 68.001        | VB   | 1.8351      | 1.48992e5    | 1103.55298   | 96.9507 |

From the aldehyde oxidation level:

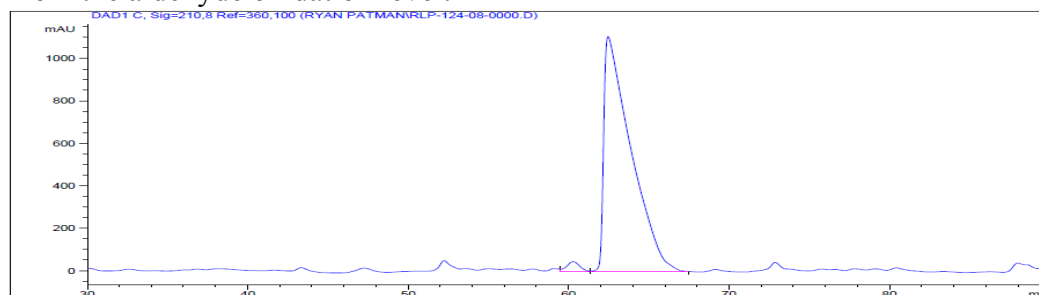

| Peak # | RetTime [min] | Type | Width [min] | Area [mAU*s] | Height [mAU] | Area %  |
|--------|---------------|------|-------------|--------------|--------------|---------|
| 1      | 60.269        | VV   | 0.8409      | 2590.31226   | 46.43082     | 1.9590  |
| 2      | 62.445        | VB   | 1.5466      | 1.29634e5    | 1106.68933   | 98.0410 |

**(R)-1-(5-methylfuran-2-yl)but-3-en-1-ol (3b)**

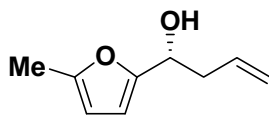

**Procedure A (via alcohol 1b):** The reaction mixture was concentrated *in vacuo* and purified by flash column chromatography (SiO<sub>2</sub>: pentane:Et<sub>2</sub>O, 5:1) to furnish the title compound (42.8 mg, 70% yield, 91% ee) as a colorless oil.

**Procedure B (via aldehyde 2b):** The reaction mixture was concentrated *in vacuo* and purified by flash column chromatography (SiO<sub>2</sub>: pentane:Et<sub>2</sub>O, 5:1) to furnish the title compound (56.2 mg, 92% yield, 94% ee) as a colorless oil.

**TLC** (SiO<sub>2</sub>): R<sub>f</sub>(Hexane:Et<sub>2</sub>O, 10:1) = 0.07.

**<sup>1</sup>H NMR** (400 MHz, CDCl<sub>3</sub>): 6.09 (d, *J* = 3.1 Hz, 1H), 5.87 (d, *J* = 2.9 Hz, 1H), 5.79 (dddd, *J* = 17.2, 10.2, 7.2, 6.9 Hz, 1H), 5.12 (m, 2H), 4.65 (t, *J* = 6.8 Hz, 1H), 2.58 (m, 2H), 2.25 (s, 3H), 2.10 (s, 1H).

**<sup>13</sup>C NMR** (100 MHz, CDCl<sub>3</sub>): 154.3, 151.9, 134.2, 118.5, 107.1, 106.2, 67.1, 40.2, 13.7.

**HRMS** (CI): Calcd. for C<sub>9</sub>H<sub>11</sub>O<sub>2</sub> (M-H)<sup>+</sup>: 151.0759, Found: 151.0756.

**FTIR** (neat): 3392, 3078, 2922, 1663, 1513, 1219, 914, 783 cm<sup>-1</sup>.

**Opt. Rot.** [α]<sub>D</sub><sup>26</sup> = -30.0 (c = 0.81, in CH<sub>2</sub>Cl<sub>2</sub>) for 95% ee (*R*)-**3b**, Lit.<sup>5</sup> [α]<sub>D</sub><sup>26</sup> = -24.8 (c = 0.98, CH<sub>2</sub>Cl<sub>2</sub>) for 94% ee (*R*)-**3b**.

**HPLC** (Chiralcel OD-H column, Hexane:*i*-PrOH, 98:2, 0.5 mL/min, 210 nm): t<sub>major</sub> = 17.2 min, t<sub>minor</sub> = 18.2 min.

*The spectroscopic properties of this compound are consistent with the data available in the literature.*<sup>5</sup>

<sup>5</sup> J. Lu, S.-J. Ji, Y.-C. Teo, T.-P. Loh, *Org. Lett.* **2005**, *7*, 159–161.

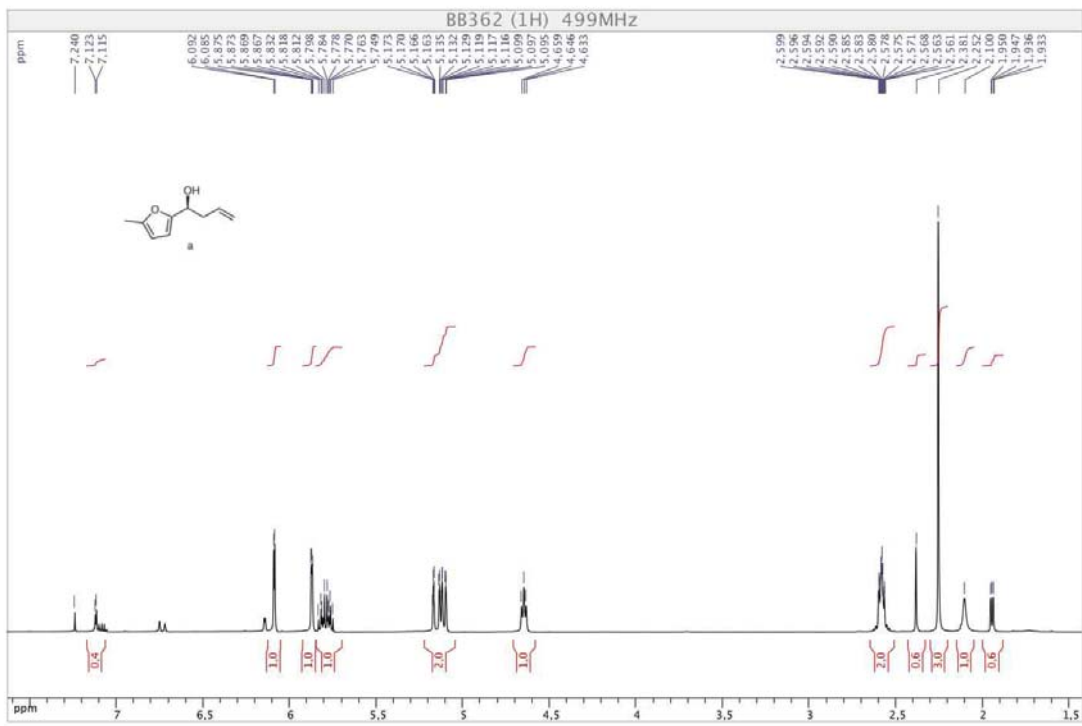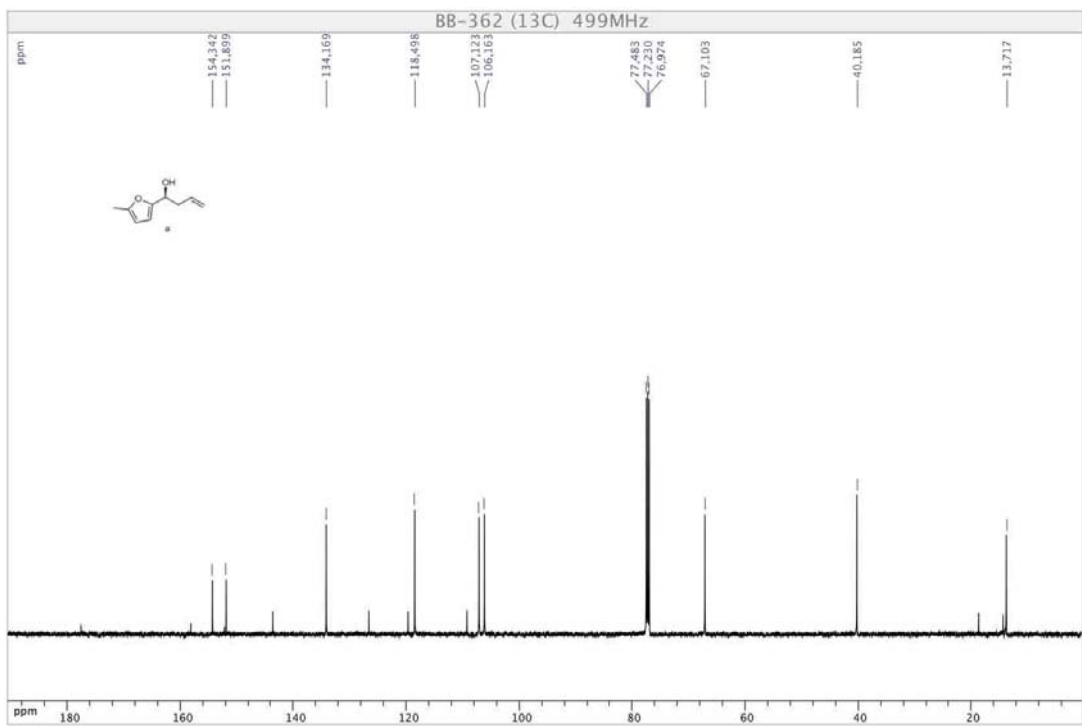

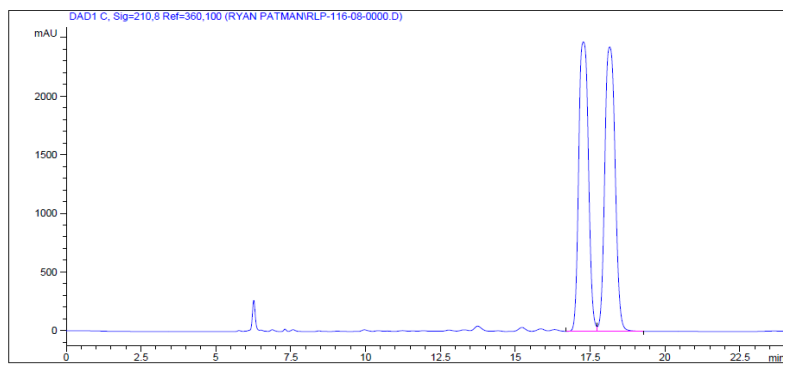

| Peak # | RetTime [min] | Type | Width [min] | Area [mAU*s] | Height [mAU] | Area %  |
|--------|---------------|------|-------------|--------------|--------------|---------|
| 1      | 17.272        | VV   | 0.3594      | 5.57880e4    | 2471.35767   | 48.8223 |
| 2      | 18.150        | VB   | 0.3850      | 5.84794e4    | 2427.95386   | 51.1777 |

From the alcohol oxidation level:

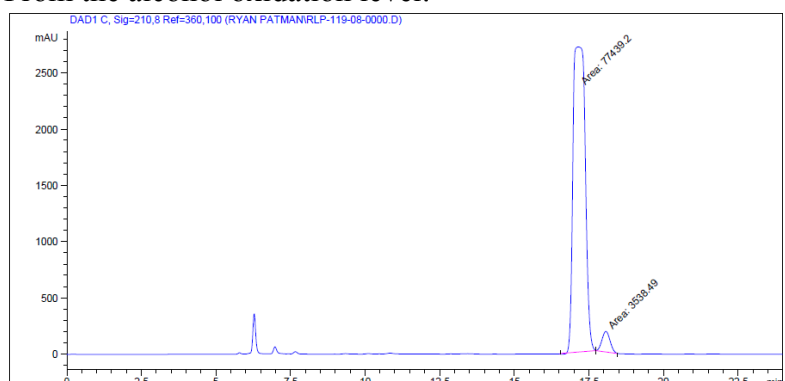

| Peak # | RetTime [min] | Type | Width [min] | Area [mAU*s] | Height [mAU] | Area %  |
|--------|---------------|------|-------------|--------------|--------------|---------|
| 1      | 17.160        | MM   | 0.4756      | 7.74392e4    | 2713.92139   | 95.6303 |
| 2      | 18.068        | MM   | 0.3180      | 3538.49072   | 185.45193    | 4.3697  |

From the aldehyde oxidation level:

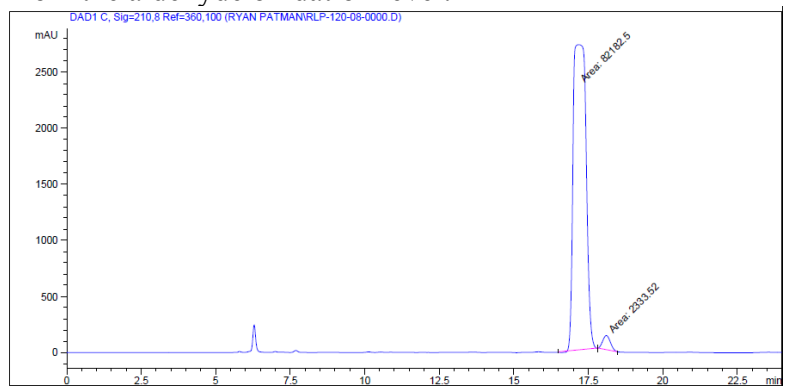

| Peak # | RetTime [min] | Type | Width [min] | Area [mAU*s] | Height [mAU] | Area %  |
|--------|---------------|------|-------------|--------------|--------------|---------|
| 1      | 17.157        | MM   | 0.5025      | 8.21825e4    | 2725.66284   | 97.2390 |
| 2      | 18.110        | MM   | 0.3037      | 2333.51880   | 128.04263    | 2.7610  |

**(R)-1-[5-(3-chloro-4-methoxyphenyl)furan-2-yl]but-3-en-1-ol (3c)**

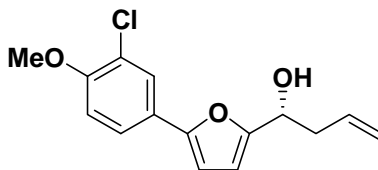

**Procedure A (via alcohol 1c):** The reaction mixture was concentrated *in vacuo* and purified by flash column chromatography (SiO<sub>2</sub>: hexane:Et<sub>2</sub>O, 4:1) to furnish the title compound (94.9 mg, 85% yield, 96% ee) as a viscous yellow oil.

**Procedure B (via aldehyde 2c):** The reaction mixture was concentrated *in vacuo* and purified by flash column chromatography (SiO<sub>2</sub>: hexane:Et<sub>2</sub>O, 4:1) to furnish the title compound (105 mg, 95% yield, 96% ee) as a viscous yellow oil.

**TLC** (SiO<sub>2</sub>): R<sub>f</sub>(Hexane:Et<sub>2</sub>O, 3:1) = 0.20.

**<sup>1</sup>H NMR** (400 MHz, CDCl<sub>3</sub>): 7.65 (d, J = 2.2 Hz, 1H), 7.49 (dd, J = 8.6, 2.2 Hz, 1H), 6.91 (d, J = 8.6 Hz, 1H), 6.46 (d, J = 3.4 Hz, 1H), 6.30 (d, J = 3.4 Hz, 1H), 5.83 (tdd, J = 17.1, 10.2, 7.0, Hz, 1H), 5.18 (m, 2H), 4.77 (dd, J = 7.0, 5.8 Hz, 1H), 3.90 (s, 3H), 2.67 (m, 2H), 2.07 (s, 1H).

**<sup>13</sup>C NMR** (100 MHz, CDCl<sub>3</sub>): 155.6, 154.5, 152.3, 133.8, 126.0, 124.9, 123.4, 123.0, 119.0, 112.4, 108.6, 105.1, 67.2, 56.5, 40.4.

**HRMS** (CI): Calcd. for C<sub>15</sub>H<sub>14</sub>O<sub>3</sub><sup>35</sup>Cl (M-H)<sup>+</sup>: 277.0631, Found: 277.0629.

**FTIR** (neat): 3383, 2940, 1658, 1613, 1490, 1475, 1266, 1062, 1019, 786, 736, 708 cm<sup>-1</sup>.

**Opt. Rot.** [α]<sub>D</sub><sup>26</sup> = +18.8 (c = 0.75, in CHCl<sub>3</sub>) for 97% ee (*R*)-**3c**.

**HPLC** (Chiralcel AS-H column, Hexane:*i*-PrOH, 95:5, 0.5 mL/min, 210 nm): t<sub>minor</sub> = 26.9 min, t<sub>major</sub> = 34.0 min.



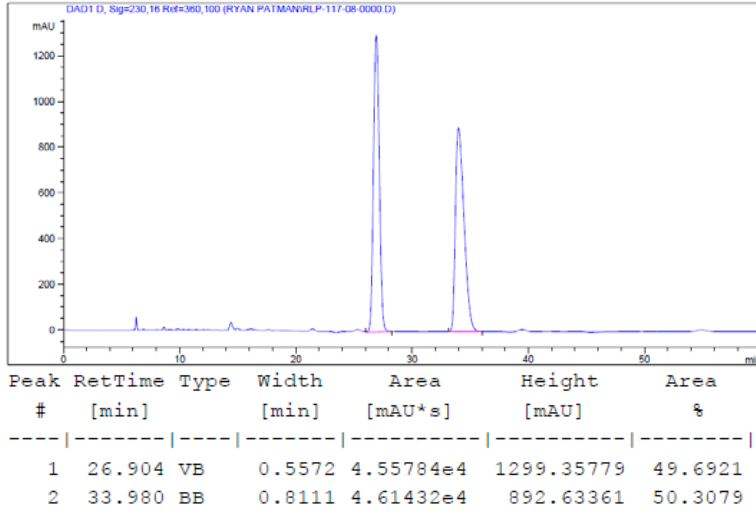

From the alcohol oxidation level:

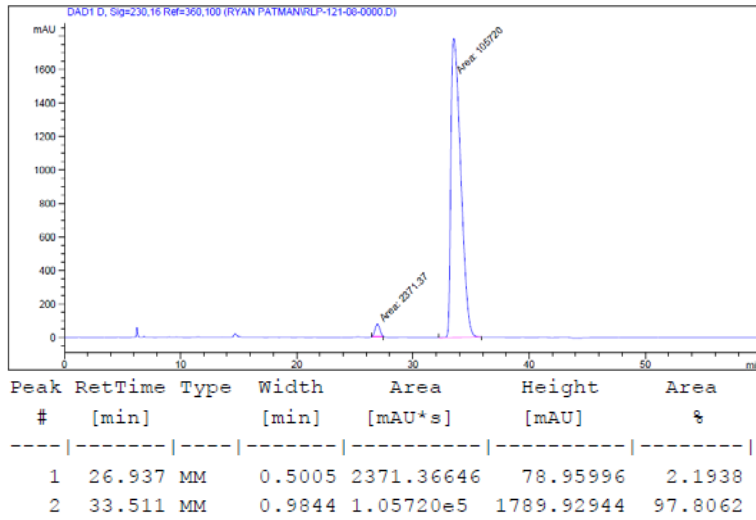

From the aldehyde oxidation level:

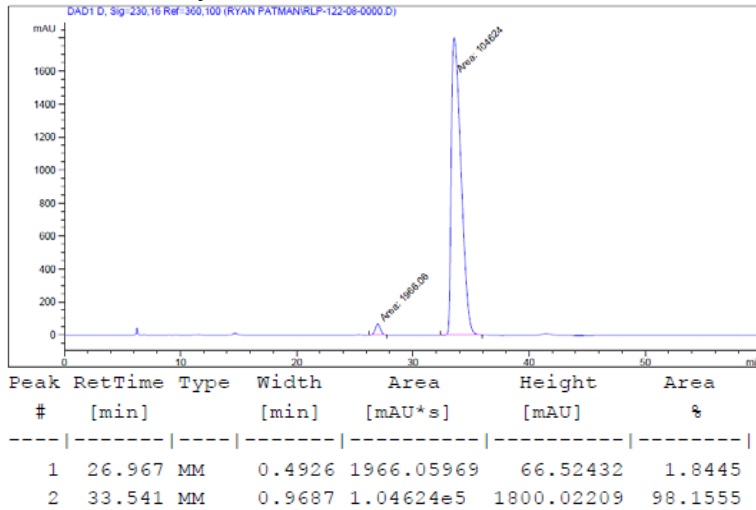



**(1*R*,2*R*)-1-(furan-2-yl)-2-methylbut-3-en-1-ol (4a)**

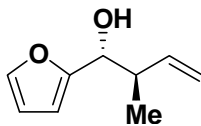

**Procedure C (via alcohol 1a):** The reaction mixture was concentrated *in vacuo* and purified by flash column chromatography (SiO<sub>2</sub>: pentane:Et<sub>2</sub>O, 5:1) to furnish the title compound (47.1 mg, 77% yield, 10:1 dr, 92% ee) as a colorless oil.

**Procedure D (via aldehyde 2a):** The reaction mixture was concentrated *in vacuo* and purified by flash column chromatography (SiO<sub>2</sub>: pentane:Et<sub>2</sub>O, 5:1) to furnish the title compound (43.9 mg, 72% yield, >20:1 dr, 97% ee) as a colorless oil.

**TLC** (SiO<sub>2</sub>): R<sub>f</sub> (Hexane:Et<sub>2</sub>O, 5:1) = 0.09.

**<sup>1</sup>H NMR** (400 MHz, CDCl<sub>3</sub>): 7.36 (d, *J* = 1.8 Hz, 1H), 6.31 (dd, *J* = 3.3, 1.9 Hz, 1H), 6.25 (d, *J* = 3.2 Hz, 1H), 5.78 (ddd, *J* = 17.2, 10.3, 8.1 Hz, 1H), 4.40 (d, *J* = 7.8 Hz, 1H), 2.68 (sext, *J* = 7.3 Hz, 1H), 2.13 (s, 1H), 0.92 (d, *J* = 6.8 Hz, 3H).

**<sup>13</sup>C NMR** (100 MHz, CDCl<sub>3</sub>): 155.2, 142.2, 140.2, 117.2, 110.3, 107.5, 71.6, 43.8, 16.4.

**HRMS** (CI): Calcd. for C<sub>9</sub>H<sub>11</sub>O<sub>2</sub> (M-H)<sup>+</sup>: 151.0759, Found: 151.0757.

**FTIR** (neat): 3398, 2973, 2931, 1073, 1007, 913 cm<sup>-1</sup>.

**Opt. Rot.** [α]<sub>D</sub><sup>26</sup> = +126.5 (c = 0.15, in CHCl<sub>3</sub>) for 95% ee

**HPLC** (Chiralcel AS-H column, Hexane:*i*-PrOH, 99:1, 0.5 mL/min, 210 nm): t<sub>major</sub> = 21.4 min, t<sub>minor</sub> = 22.9 min.

*The spectroscopic properties of this compound are consistent with the data available in the literature.*<sup>6</sup>

<sup>6</sup> M. Tsubuki, T. Kamata, M. Nakatani, K. Yamazaki, T. Matsui, T. Honda, *Tetrahedron: Asymmetry* **2000**, *11*, 4725-4736.

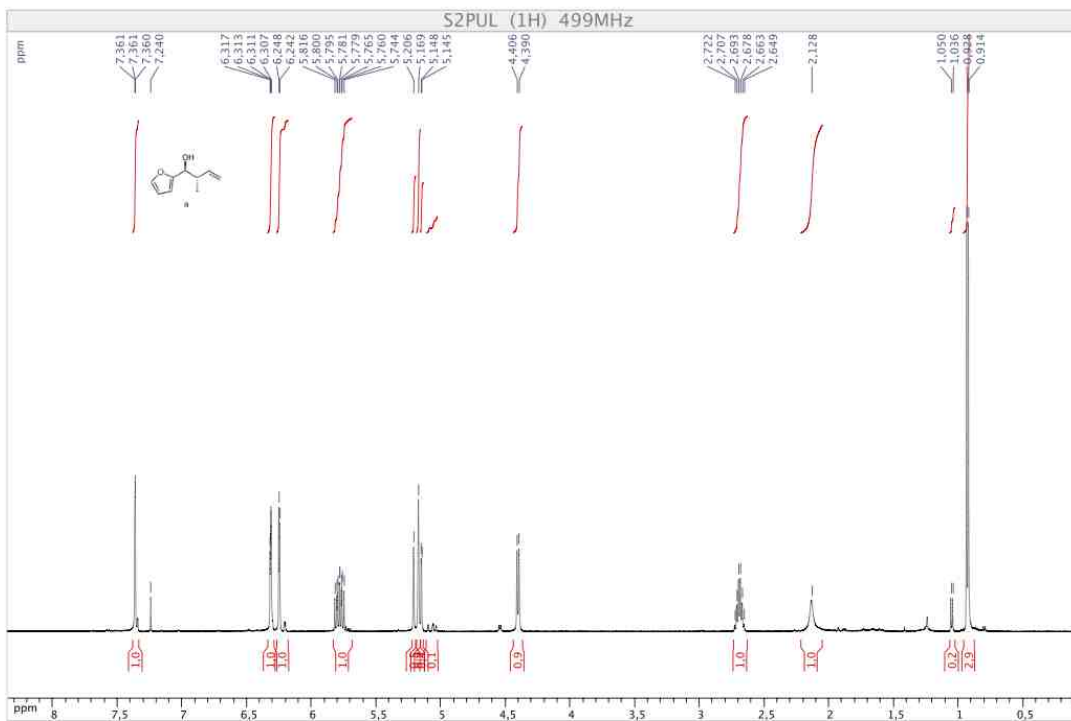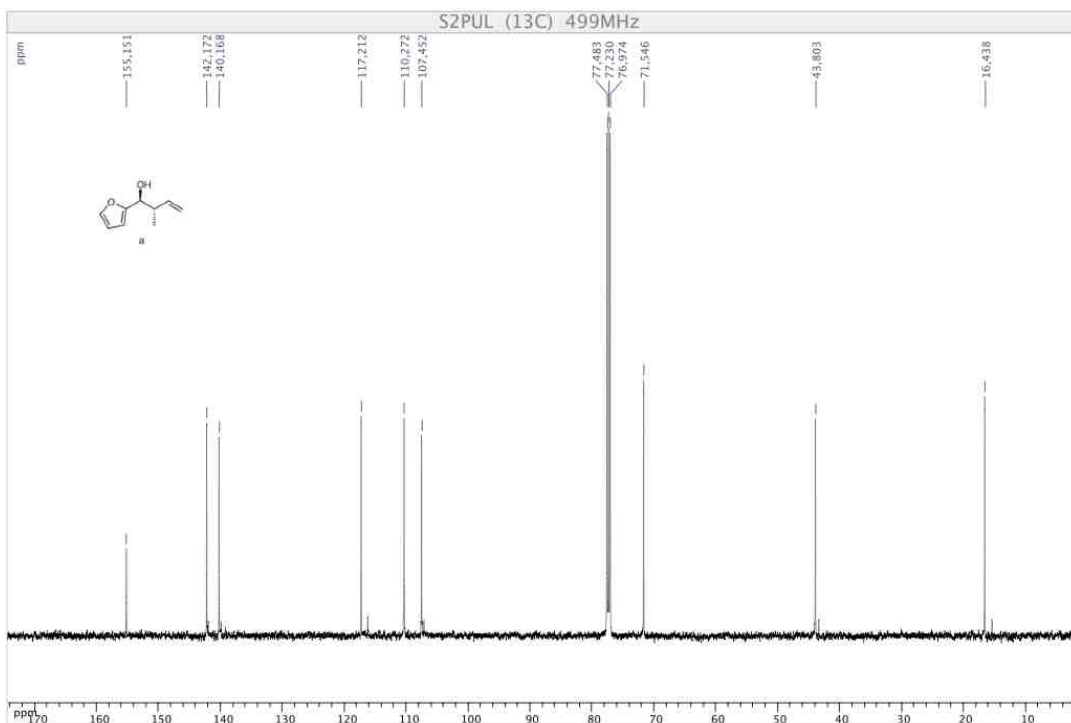

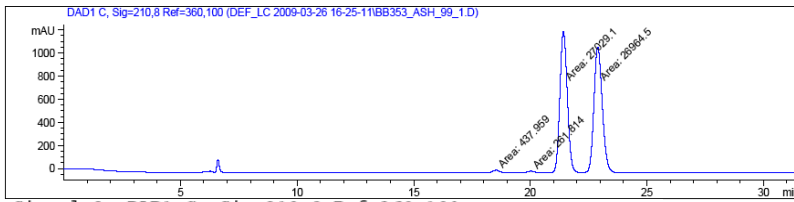

Signal 2: DAD1 C, Sig=210,8 Ref=360,100

| Peak # | RetTime [min] | Type | Width [min] | Area [mAU*s] | Height [mAU] | Area %  |
|--------|---------------|------|-------------|--------------|--------------|---------|
| 1      | 18.519        | MM T | 0.3414      | 437.95856    | 21.38206     | 0.8008  |
| 2      | 20.011        | MM T | 0.3443      | 261.81375    | 12.67479     | 0.4787  |
| 3      | 21.413        | MM T | 0.3703      | 2.70291e4    | 1216.39795   | 49.4193 |
| 4      | 22.886        | MM T | 0.4145      | 2.69645e4    | 1084.21619   | 49.3012 |

Totals : 5.46934e4 2334.67098

From the alcohol oxidation level:

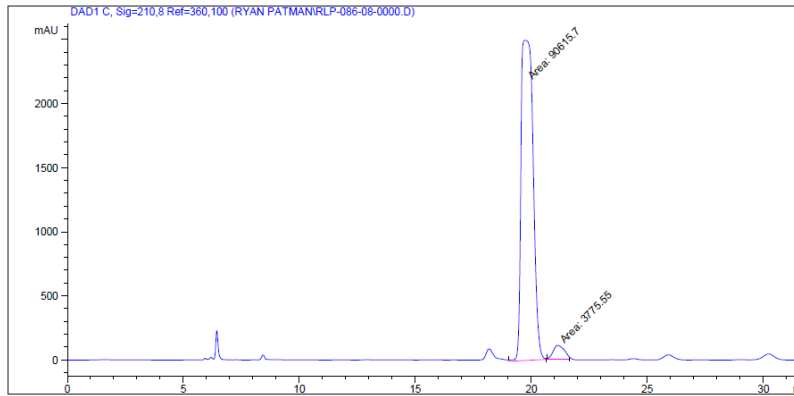

| Peak # | RetTime [min] | Type | Width [min] | Area [mAU*s] | Height [mAU] | Area %  |
|--------|---------------|------|-------------|--------------|--------------|---------|
| 1      | 19.756        | MM   | 0.6045      | 9.06157e4    | 2498.32495   | 96.0001 |
| 2      | 21.133        | MM   | 0.5759      | 3775.55396   | 109.27399    | 3.9999  |

From the aldehyde oxidation level:

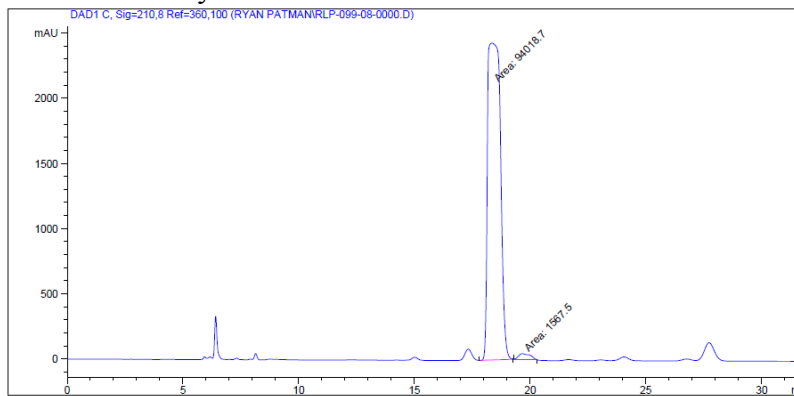

| Peak # | RetTime [min] | Type | Width [min] | Area [mAU*s] | Height [mAU] | Area %  |
|--------|---------------|------|-------------|--------------|--------------|---------|
| 1      | 18.341        | MM   | 0.6439      | 9.40187e4    | 2433.46191   | 98.3601 |
| 2      | 19.654        | MM   | 0.5769      | 1567.49866   | 45.28896     | 1.6399  |

**(1*R*,2*R*)-2-methyl-1-(5-methylfuran-2-yl)but-3-en-1-ol (4b)**

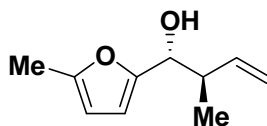

**Procedure C (via alcohol 1b):** The reaction mixture was concentrated *in vacuo* and purified by flash column chromatography (SiO<sub>2</sub>: pentane:Et<sub>2</sub>O, 5:1) to furnish the title compound (50.3 mg, 76% yield, 7:1 dr, 91% ee) as a colorless oil.

**Procedure D (via aldehyde 2b):** The reaction mixture was concentrated *in vacuo* and purified by flash column chromatography (SiO<sub>2</sub>: pentane:Et<sub>2</sub>O, 5:1) to furnish the title compound (52.6 mg, 79% yield, >20:1 dr, 94% ee) as a colorless oil.

**TLC** (SiO<sub>2</sub>): R<sub>f</sub> (Hexane:Et<sub>2</sub>O, 5:1) = 0.09.

**<sup>1</sup>H NMR** (400 MHz, CDCl<sub>3</sub>): 6.11 (d, *J* = 3.2 Hz, 1H), 5.88 (d, *J* = 3.2 Hz, 1H), 5.79 (ddd, *J* = 17.3, 10.3, 8.1 Hz, 1H), 5.17 (m, 2H), 4.31 (dd, *J* = 8.1, 3.8 Hz, 1H), 2.67 (sext, *J* = 7.3 Hz, 1H), 2.26 (s, 3H), 2.06 (d, *J* = 4.0 Hz, 1H), 0.92 (d, *J* = 6.8 Hz, 3H).

**<sup>13</sup>C NMR** (100 MHz, CDCl<sub>3</sub>): 153.2, 151.9, 140.5, 117.1, 108.4, 106.1, 71.6, 43.7, 16.7, 13.8.

**HRMS** (CI): Calcd. for C<sub>10</sub>H<sub>13</sub>O<sub>2</sub> (M-H)<sup>+</sup>: 165.0916, Found: 165.0916.

**FTIR** (neat): 3414, 2965, 2924, 1219, 1017, 912 cm<sup>-1</sup>.

**Opt. Rot.** [α]<sub>D</sub><sup>26</sup> = +69.1 (c = 0.58, in CHCl<sub>3</sub>) for 88% ee

**HPLC** (Chiralcel AD-H column, hexane:*i*-PrOH, 95:5, 0.5 mL/min, 210 nm): t<sub>minor</sub> = 14.2 min, t<sub>major</sub> = 14.9 min

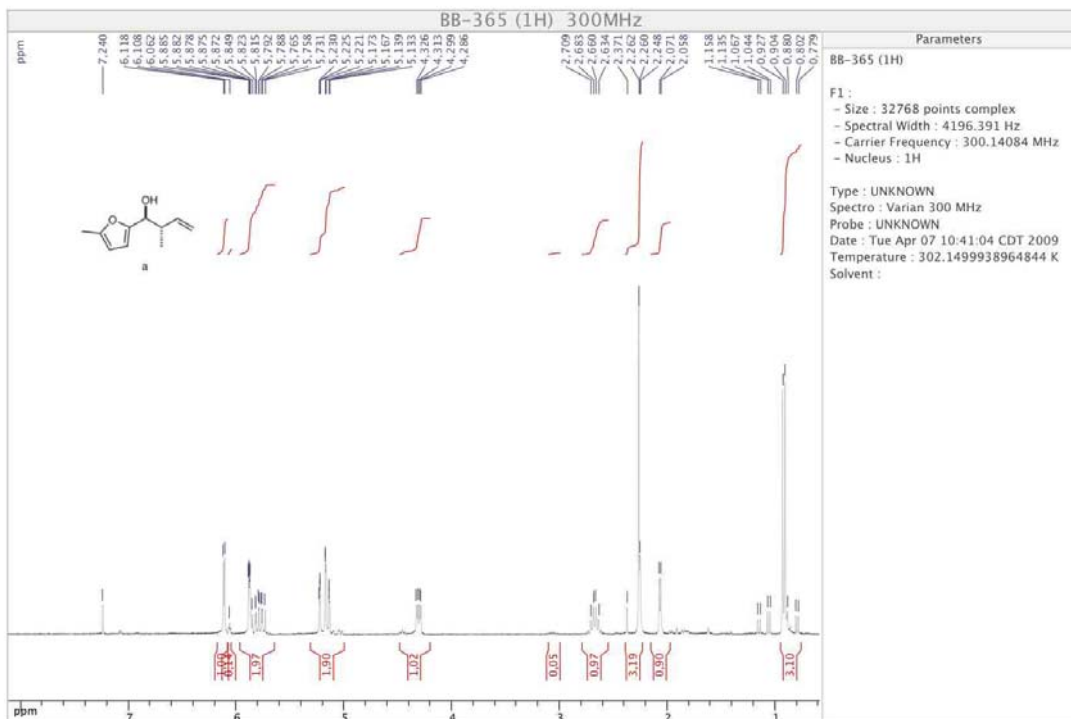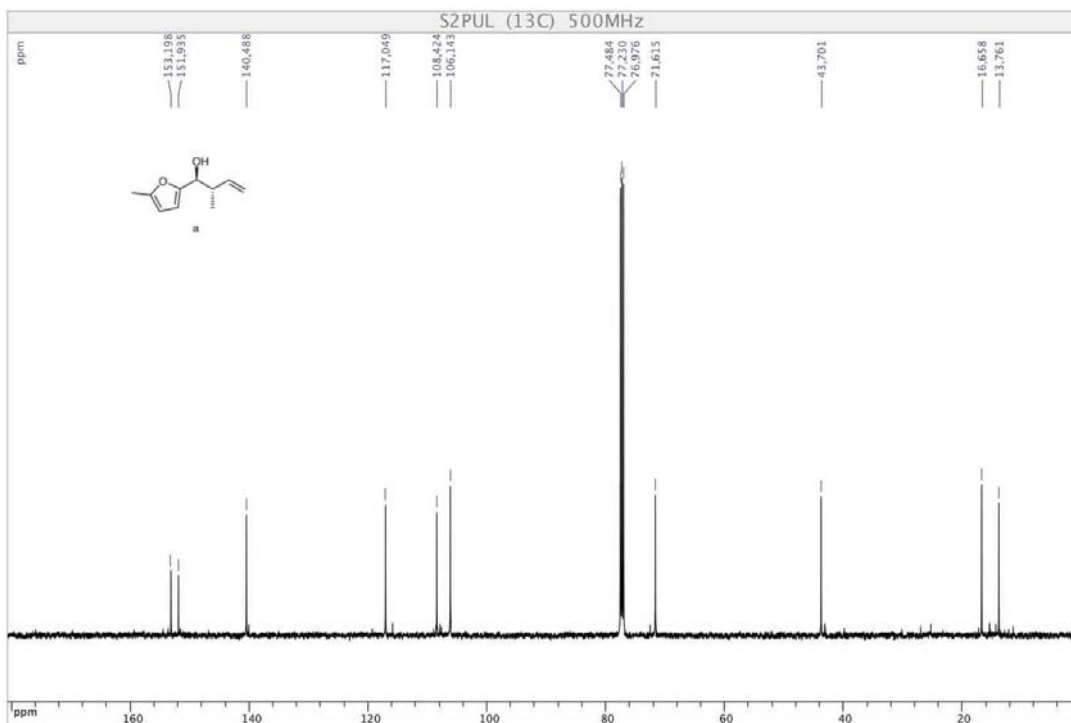

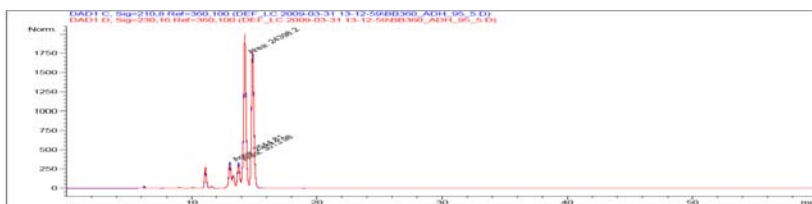

Signal 1: DAD1 C, Sig=210,8 Ref=360,100

| Peak # | RetTime [min] | Type | Width [min] | Area [mAU*s] | Height [mAU] | Area %  |
|--------|---------------|------|-------------|--------------|--------------|---------|
| 1      | 13.037        | MM T | 0.1679      | 2544.80933   | 252.56302    | 4.7655  |
| 2      | 13.741        | MM T | 0.1848      | 3013.97974   | 271.80624    | 5.6441  |
| 3      | 14.245        | MM T | 0.2182      | 2.43982e4    | 1863.61255   | 45.6893 |
| 4      | 14.863        | MM R | 0.2277      | 2.34432e4    | 1715.61096   | 43.9010 |

From the alcohol oxidation level:

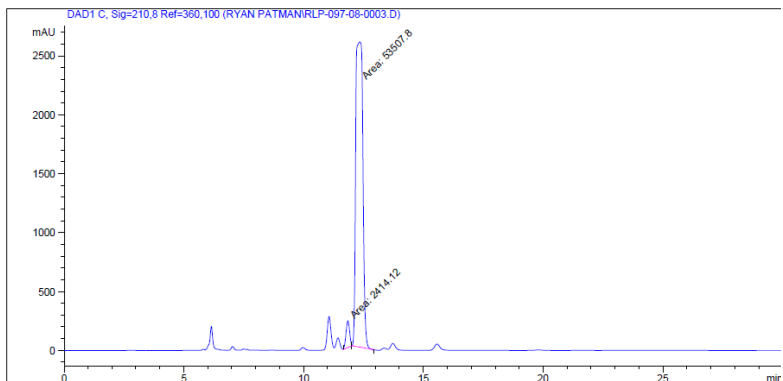

| Peak # | RetTime [min] | Type | Width [min] | Area [mAU*s] | Height [mAU] | Area %  |
|--------|---------------|------|-------------|--------------|--------------|---------|
| 1      | 11.842        | MM   | 0.1753      | 2414.11572   | 229.53998    | 4.3169  |
| 2      | 12.336        | MM   | 0.3439      | 5.35078e4    | 2593.21167   | 95.6831 |

From the aldehyde oxidation level:

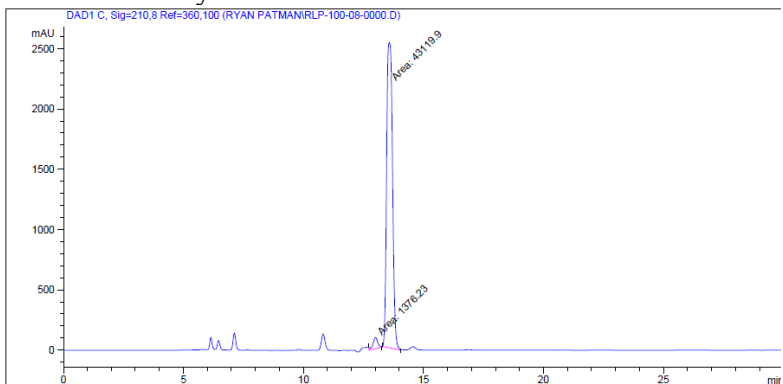

| Peak # | RetTime [min] | Type | Width [min] | Area [mAU*s] | Height [mAU] | Area %  |
|--------|---------------|------|-------------|--------------|--------------|---------|
| 1      | 12.994        | MM   | 0.2388      | 1376.22986   | 96.07098     | 3.0929  |
| 2      | 13.571        | MM   | 0.2836      | 4.31199e4    | 2534.23608   | 96.9071 |

**(1R,2R)-1-[5-(3-chloro-4-methoxyphenyl)furan-2-yl]-2-methylbut-3-en-1-ol (4c)**

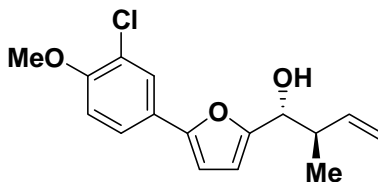

**Procedure C (via alcohol 1c):** The reaction mixture was concentrated *in vacuo* and purified by flash column chromatography (SiO<sub>2</sub>: hexane:Et<sub>2</sub>O, 4:1) to furnish the title compound (111 mg, 95% yield, 10:1 dr, 95% ee) as a viscous yellow oil.

**Procedure D (via aldehyde 2c):** The reaction mixture was concentrated *in vacuo* and purified by flash column chromatography (SiO<sub>2</sub>: hexane:Et<sub>2</sub>O, 4:1) to furnish the title compound (110 mg, 94% yield, >20:1 dr, 99% ee) as a viscous yellow oil.

**TLC** (SiO<sub>2</sub>): R<sub>f</sub> (Hexane:EtOAc, 3:1) = 0.14.

**<sup>1</sup>H NMR** (400 MHz, CDCl<sub>3</sub>): 7.64 (d, *J* = 2.2 Hz, 1H), 7.48 (dd, *J* = 8.6, 2.1 Hz, 1H), 6.90 (d, *J* = 8.7 Hz, 1H), 6.46 (d, *J* = 3.5 Hz, 1H), 6.31 (d, *J* = 3.3 Hz, 1H), 5.82 (ddd, *J* = 17.3, 10.3, 8.0 Hz, 1H), 5.19 (m, 2H), 4.44 (dd, *J* = 7.8, 2.7 Hz, 1H), 3.90 (s, 3H), 2.75 (m, 1H), 2.16 (d, *J* = 3.0 Hz, 1H), 0.98 (d, *J* = 6.8 Hz, 3H).

**<sup>13</sup>C NMR** (100 MHz, CDCl<sub>3</sub>): 154.7, 154.4, 152.2, 140.1, 125.9, 124.9, 123.4, 123.0, 117.3, 112.3, 109.6, 105.1, 71.7, 56.4, 43.8, 16.6.

**HRMS** (CI): Calcd. for C<sub>16</sub>H<sub>18</sub>O<sub>3</sub><sup>35</sup>Cl (M+H)<sup>+</sup>: 293.0944, Found: 293.0946.

**FTIR** (neat): 3427, 2967, 1490, 1439, 1289, 1267, 1062, 1018, 909, 788, 730, 709 cm<sup>-1</sup>.

**Opt. Rot.** [α]<sub>D</sub><sup>26</sup> = +4.7 (c = 1.07, in CHCl<sub>3</sub>) for 83% ee

**HPLC** (Chiralcel AD-H column, Hexane:*i*-PrOH, 98:2, 0.8 mL/min, 210 nm): t<sub>major</sub> = 28.4 min, t<sub>minor</sub> = 34.2 min.

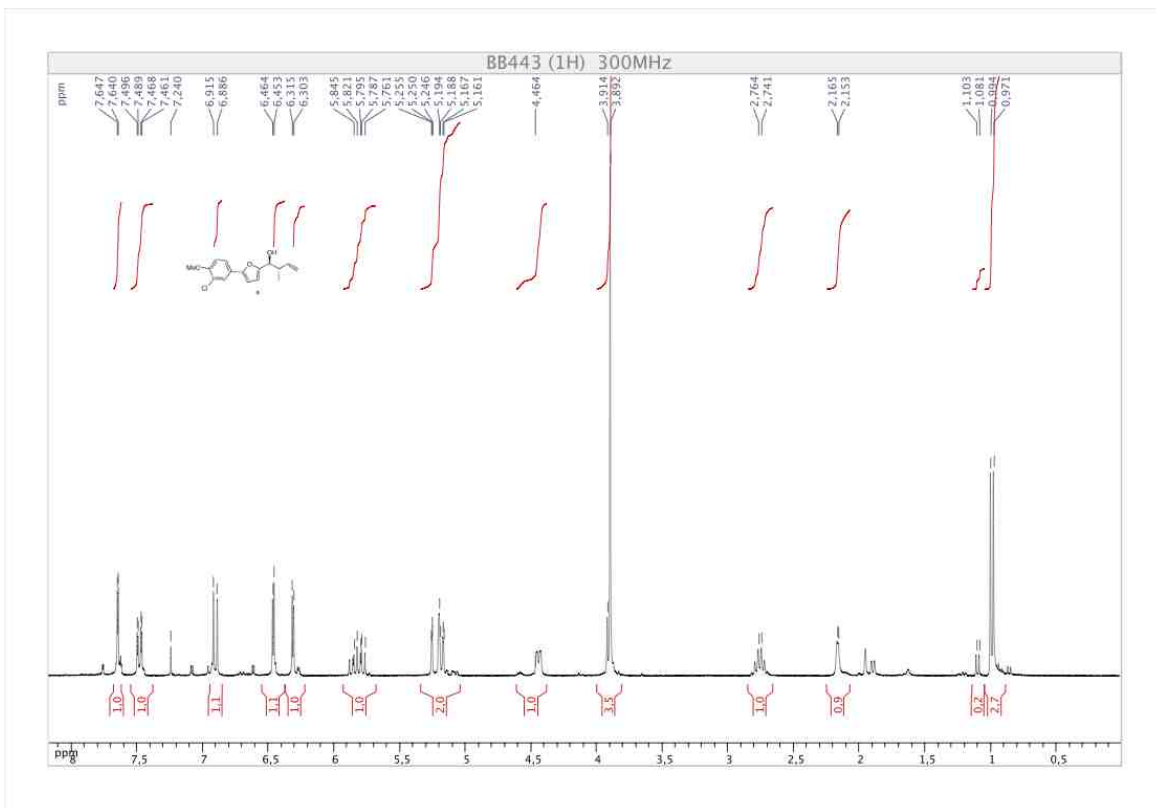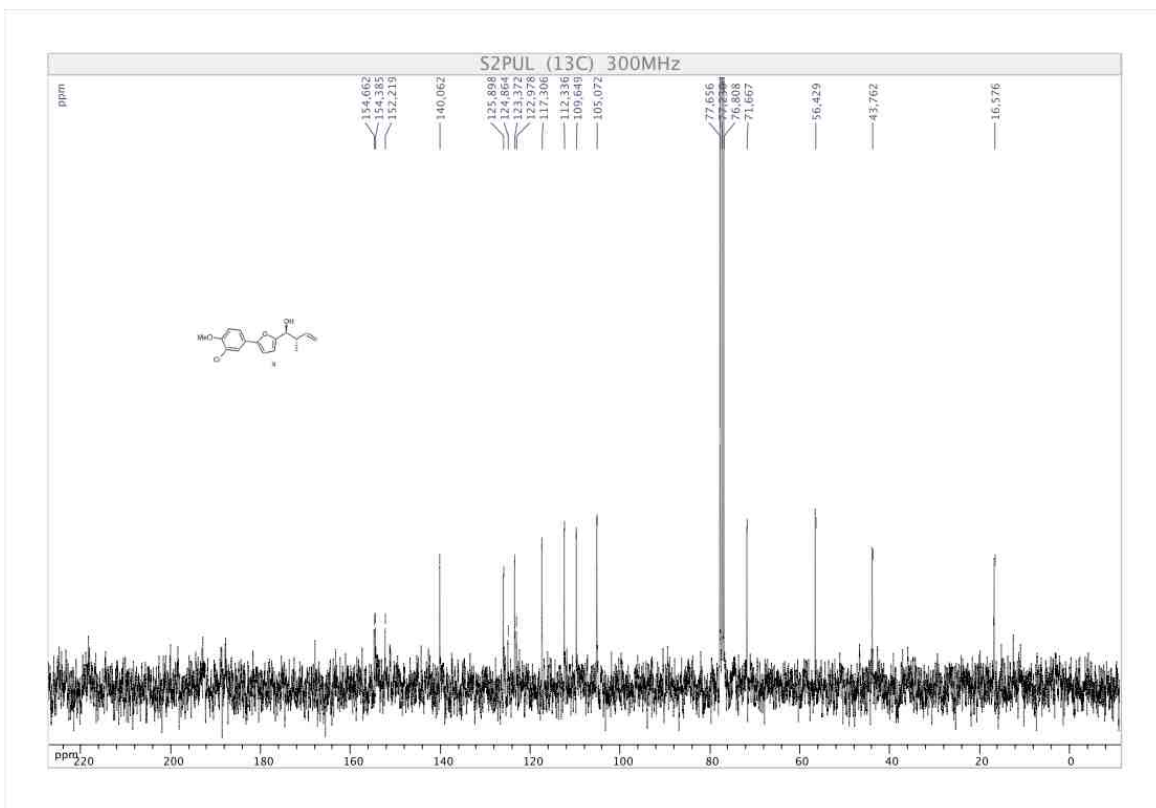



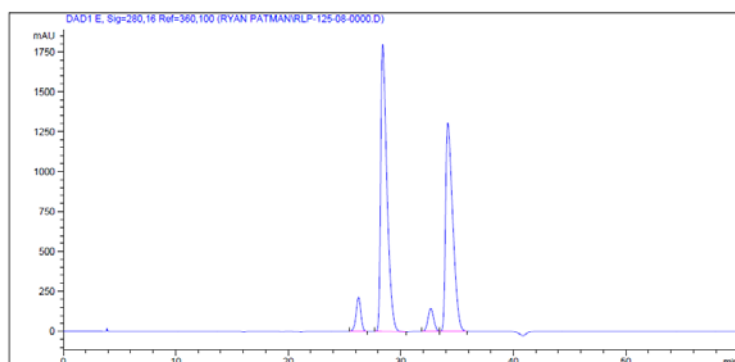

| Peak # | RetTime [min] | Type | Width [min] | Area [mAU*s] | Height [mAU] | Area %  |
|--------|---------------|------|-------------|--------------|--------------|---------|
| 1      | 26.231        | BB   | 0.4536      | 6320.72314   | 214.58772    | 4.5532  |
| 2      | 28.380        | BB   | 0.5759      | 6.93016e4    | 1797.28894   | 49.9218 |
| 3      | 32.646        | BV   | 0.5539      | 5061.10547   | 142.67514    | 3.6458  |
| 4      | 34.166        | VB   | 0.6776      | 5.81370e4    | 1305.43762   | 41.8793 |

From the alcohol oxidation level:

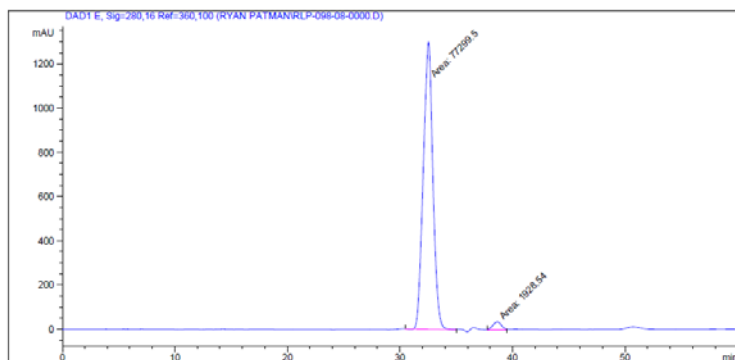

| Peak # | RetTime [min] | Type | Width [min] | Area [mAU*s] | Height [mAU] | Area %  |
|--------|---------------|------|-------------|--------------|--------------|---------|
| 1      | 32.527        | MM   | 0.9909      | 7.72995e4    | 1300.20459   | 97.5658 |
| 2      | 38.642        | MM   | 0.8857      | 1928.54309   | 36.29213     | 2.4342  |

From the aldehyde oxidation level:

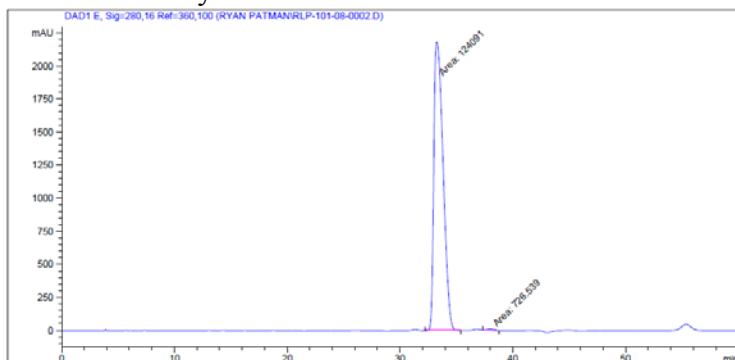

| Peak # | RetTime [min] | Type | Width [min] | Area [mAU*s] | Height [mAU] | Area %  |
|--------|---------------|------|-------------|--------------|--------------|---------|
| 1      | 33.244        | MM   | 0.9481      | 1.24091e5    | 2181.28174   | 99.4179 |
| 2      | 38.040        | MM   | 0.9231      | 726.53894    | 13.11822     | 0.5821  |

**(R)-1-(furan-2-yl)-2,2-dimethylbut-3-en-1-ol (5a)**

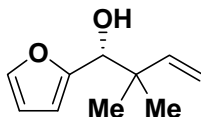

**Procedure E (via alcohol 1a):** Reaction was conducted on 0.4 mmol scale with respect to alcohol. The reaction mixture was concentrated *in vacuo* and purified by flash column chromatography (SiO<sub>2</sub>: hexane:EtOAc, 10:1) to furnish the title compound (54.5 mg, 82% yield, 87% ee) as a colorless oil.

**Procedure F (via aldehyde 2a):** Reaction was conducted on 0.4 mmol scale with respect to aldehyde. The reaction mixture was concentrated *in vacuo* and purified by flash column chromatography (SiO<sub>2</sub>: hexane:EtOAc, 10:1) to furnish the title compound (54.5 mg, 82% yield, 88% ee) as a colorless oil.

**TLC** (SiO<sub>2</sub>): R<sub>f</sub>(Hexane:Et<sub>2</sub>O, 10:1) = 0.18.

**<sup>1</sup>H NMR** (400 MHz, CDCl<sub>3</sub>): 7.33 (m, 1H), 6.31 (dd, *J* = 3.1, 1.7 Hz, 1H), 6.20 (d, *J* = 3.2 Hz, 1H), 5.90 (dd, *J* = 17.5, 10.9 Hz, 1H), 5.10 (m, 2H), 4.39 (s, 1H), 2.02 (s, 1H), 1.05 (s, 3H), 1.00 (s, 3H).

**HRMS** (CI): Calcd. for C<sub>10</sub>H<sub>15</sub>O<sub>2</sub> (M+H)<sup>+</sup>: 167.1072, Found: 167.1077.

**FTIR** (neat): 3435, 2966, 2873, 1638, 1469, 1149, 1007, 915, 731 cm<sup>-1</sup>.

**Opt. Rot.** [α]<sub>D</sub><sup>26</sup> = +78.4 (c = 0.97, in Ethanol), Lit.<sup>7</sup> [α]<sub>D</sub><sup>26</sup> = -15.1 (c = 1.00, in ethanol) for 95% ee (*S*)-**5a**.

**HPLC** (Chiralcel AD-H column, Hexane:*i*-PrOH, 98:2, 0.5 mL/min, 210 nm): t<sub>major</sub> = 19.0 min, t<sub>minor</sub> = 19.9 min.

*The spectroscopic properties of this compound are consistent with the data available in the literature.<sup>7</sup>*

<sup>7</sup> S. E. Denmark, J. Fu, M. J. Lawler, *J. Org. Chem.* **2006**, *71*, 1523–1536.

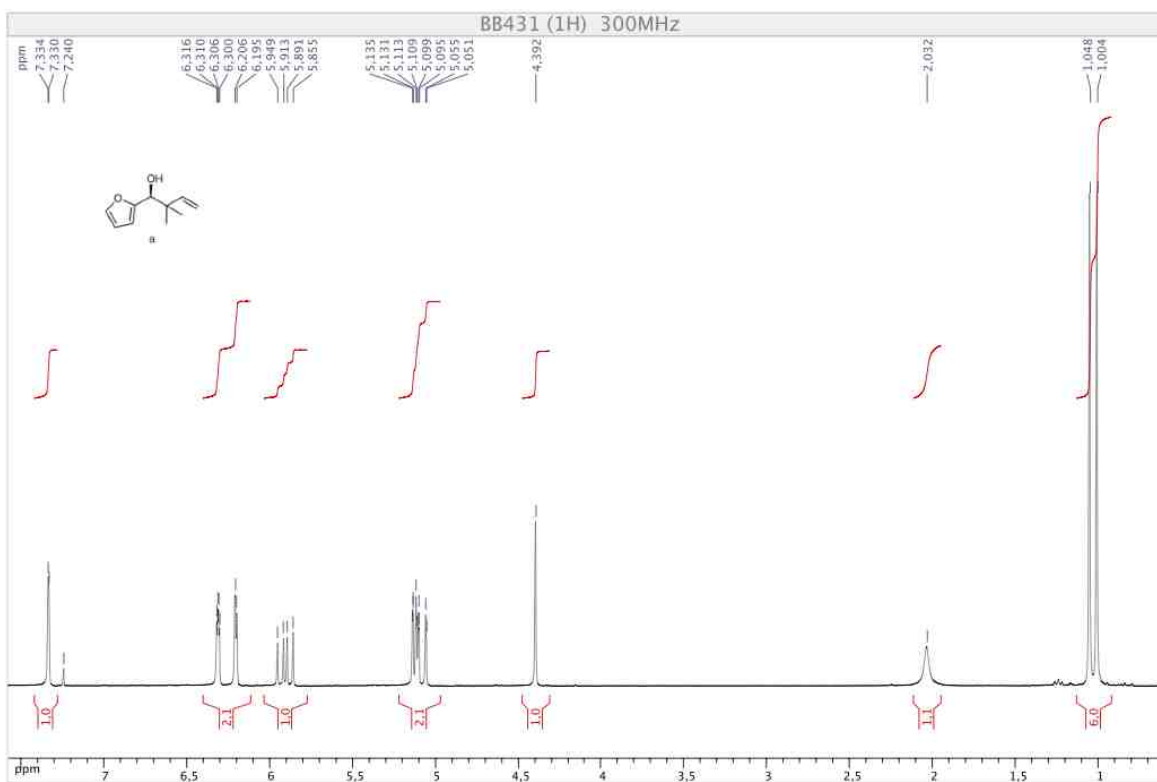

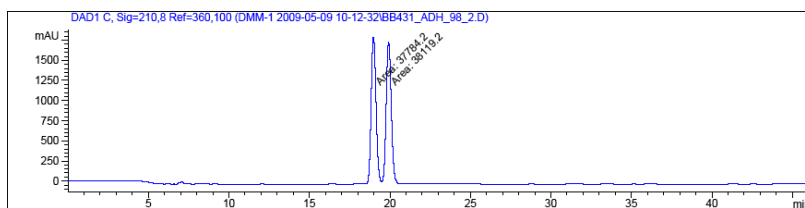

Signal 1: DAD1 C, Sig=210,8 Ref=360,100

| Peak # | RetTime [min] | Type | Width [min] | Area [mAU*s] | Height [mAU] | Area %  |
|--------|---------------|------|-------------|--------------|--------------|---------|
| 1      | 18.977        | MM T | 0.3470      | 3.77842e4    | 1814.89001   | 49.7794 |
| 2      | 19.916        | MM T | 0.3631      | 3.81192e4    | 1749.71460   | 50.2206 |

Totals : 7.59033e4 3564.60461

From the alcohol oxidation level:

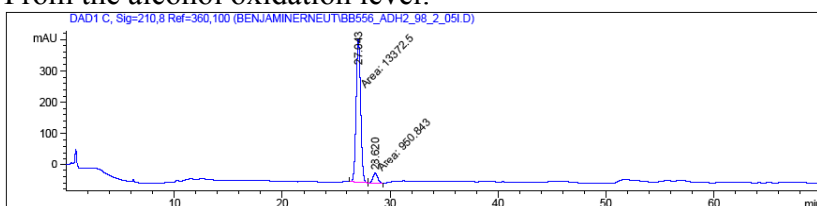

Signal 1: DAD1 C, Sig=210,8 Ref=360,100

| Peak # | RetTime [min] | Type | Width [min] | Area [mAU*s] | Height [mAU] | Area %  |
|--------|---------------|------|-------------|--------------|--------------|---------|
| 1      | 27.043        | MM T | 0.4844      | 1.33725e4    | 460.13919    | 93.3616 |
| 2      | 28.620        | MM T | 0.4986      | 950.84259    | 31.78444     | 6.6384  |

From the aldehyde oxidation level:

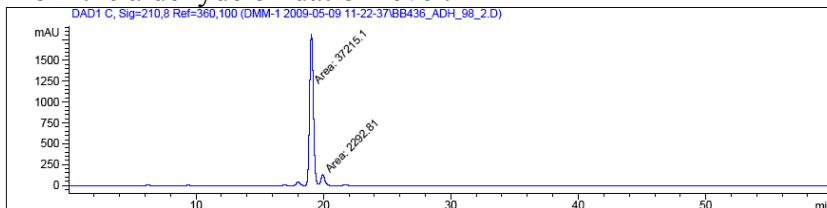

Signal 1: DAD1 C, Sig=210,8 Ref=360,100

| Peak # | RetTime [min] | Type | Width [min] | Area [mAU*s] | Height [mAU] | Area %  |
|--------|---------------|------|-------------|--------------|--------------|---------|
| 1      | 19.049        | MM T | 0.3411      | 3.72151e4    | 1818.16675   | 94.1966 |
| 2      | 19.948        | MM T | 0.3245      | 2292.80566   | 117.75801    | 5.8034  |

Totals : 3.95079e4 1935.92476

**(R)-2,2-dimethyl-1-(5-methylfuran-2-yl)but-3-en-1-ol (5b)**

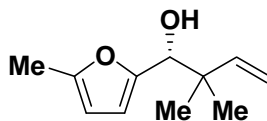

**Procedure E (via alcohol 1b):** The reaction was conducted on 0.6 mmol scale with respect to alcohol. The reaction mixture was concentrated *in vacuo* and purified by flash column chromatography (SiO<sub>2</sub>, hexane:EtOAc, 10:1) to furnish the title compound (90.7 mg, 84% yield, 84% ee) as a colorless oil.

**Procedure F (via aldehyde 2b):** The reaction was conducted on 0.6 mmol scale with respect to aldehyde. The reaction mixture was concentrated *in vacuo* and purified by flash column chromatography (SiO<sub>2</sub>, hexane:EtOAc, 10:1) to furnish the title compound (96.1 mg, 89% yield, 89% ee) as a colorless oil.

**TLC** (SiO<sub>2</sub>): R<sub>f</sub>(Hexane:Et<sub>2</sub>O, 10:1) = 0.22.

**<sup>1</sup>H NMR** (400 MHz, CDCl<sub>3</sub>): 6.07 (d, *J* = 3.0 Hz, 1H), 5.92 (dd, *J* = 17.4, 10.9 Hz, 1H), 5.88 (d, *J* = 3.0 Hz, 1H), 5.11 (dd, *J* = 10.9, 1.3 Hz, 1H), 5.09 (dd, *J* = 17.4, 1.2 Hz, 1H), 4.32 (d, *J* = 5.0 Hz, 1H), 2.25 (s, 3H), 1.99 (d, *J* = 5.3 Hz, 1H), 1.05 (s, 3H), 1.01 (s, 3H).

**<sup>13</sup>C NMR** (100 MHz, CDCl<sub>3</sub>): 153.0, 151.4, 144.8, 114.0, 108.5, 106.1, 75.3, 42.3, 24.1, 22.4, 13.8.

**HRMS** (CI): Calcd. for C<sub>11</sub>H<sub>16</sub>O<sub>2</sub> (M)<sup>+</sup>: 180.1150, Found: 180.1147.

**FTIR** (neat): 3439, 2964, 2924, 2873, 1638, 1560, 1380, 1057, 1019, 913, 783 cm<sup>-1</sup>.

**Opt. Rot.** [α]<sub>D</sub><sup>26</sup> = +59.8 (c = 1.14, in CHCl<sub>3</sub>).

**HPLC** (Chiralcel AD-H column, hexane:*i*-PrOH, 95:5, 0.5 mL/min, 210 nm): t<sub>major</sub> = 12.4 min, t<sub>minor</sub> = 13.4 min.

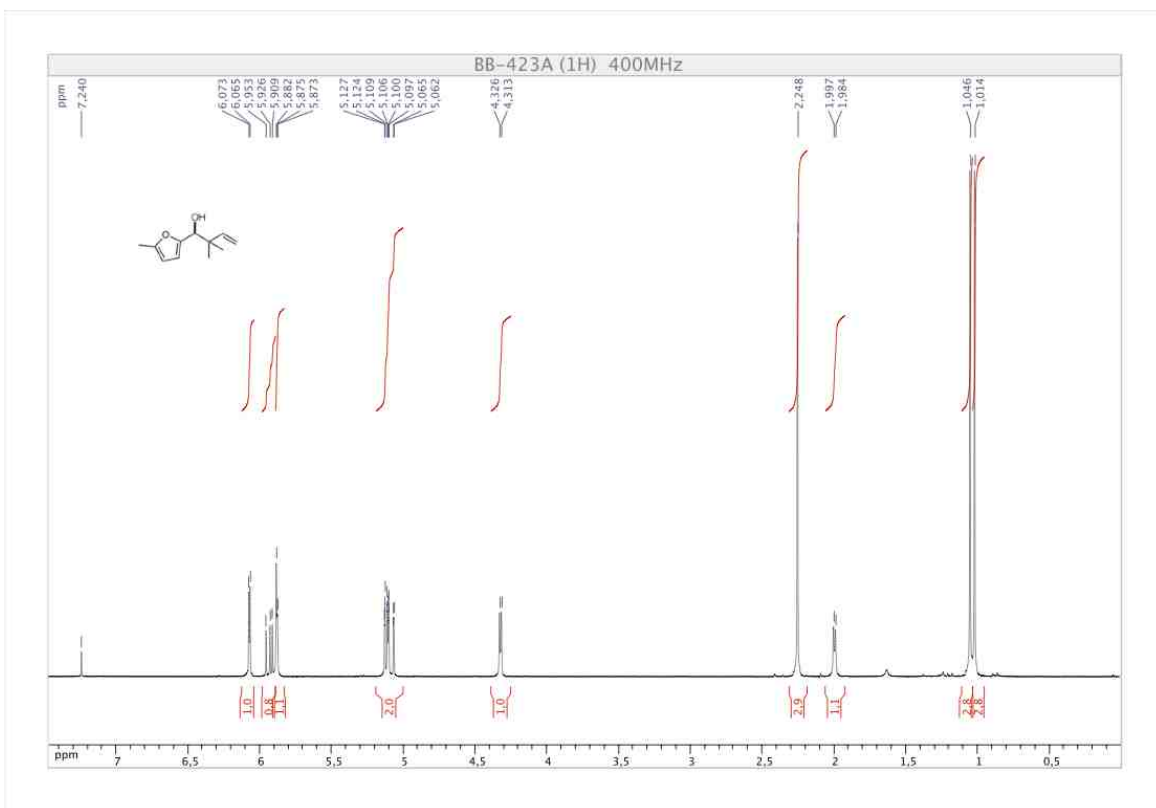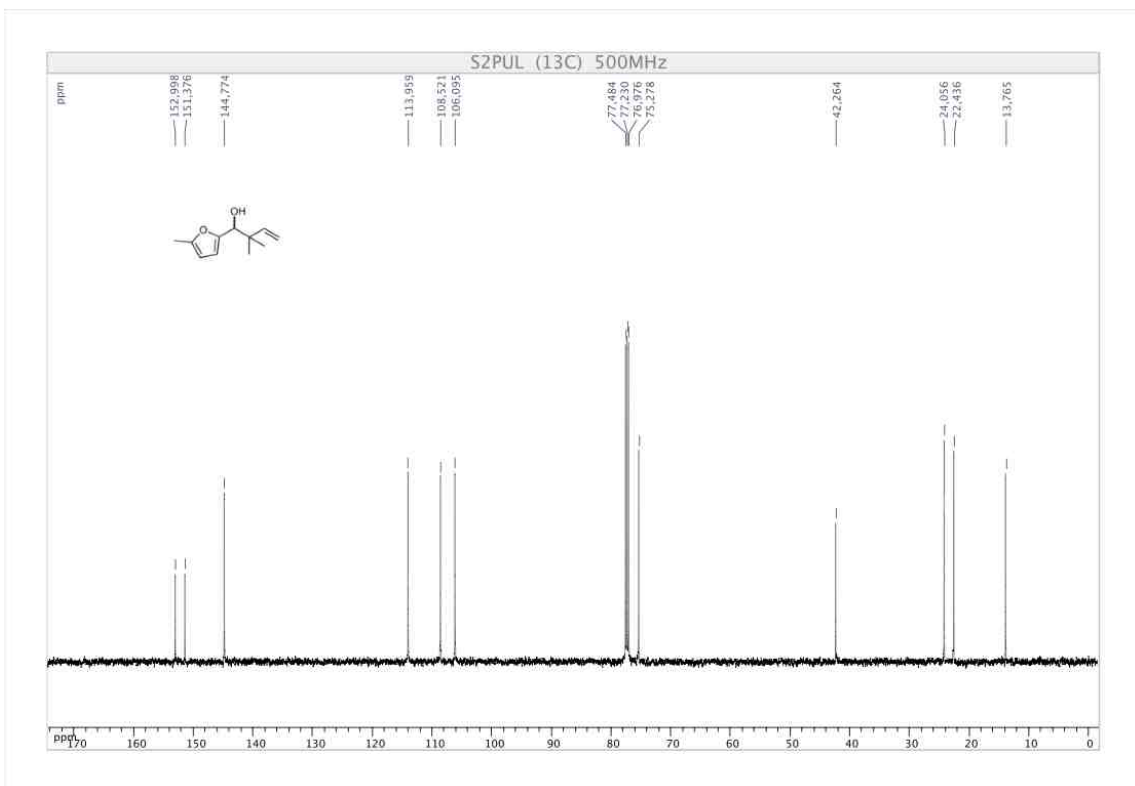

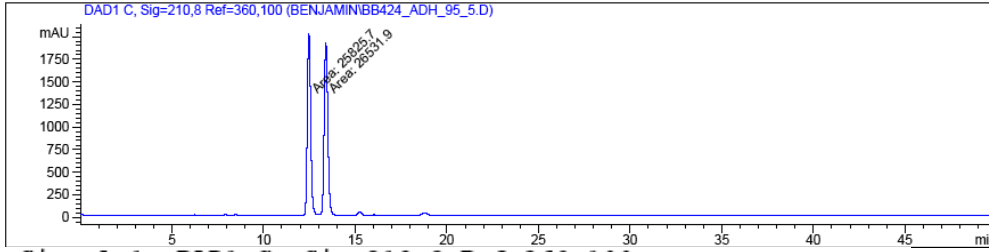

Signal 1: DAD1 C, Sig=210,8 Ref=360,100

| Peak # | RetTime [min] | Type | Width [min] | Area [mAU*s] | Height [mAU] | Area %  |
|--------|---------------|------|-------------|--------------|--------------|---------|
| 1      | 12.472        | MM T | 0.2136      | 2.58257e4    | 2015.24121   | 49.3256 |
| 2      | 13.398        | MM T | 0.2314      | 2.65319e4    | 1910.89221   | 50.6744 |

From the alcohol oxidation level:

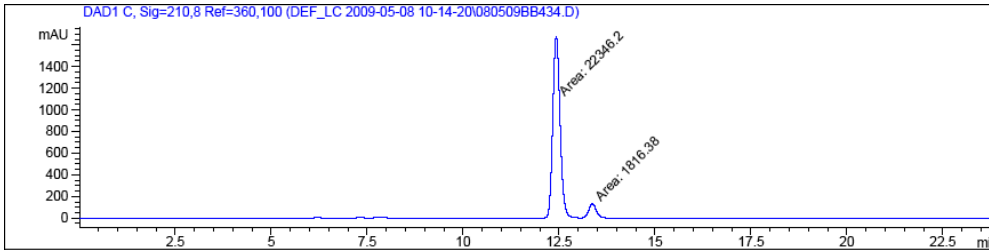

Signal 1: DAD1 C, Sig=210,8 Ref=360,100

| Peak # | RetTime [min] | Type | Width [min] | Area [mAU*s] | Height [mAU] | Area %  |
|--------|---------------|------|-------------|--------------|--------------|---------|
| 1      | 12.425        | MM T | 0.2207      | 2.23462e4    | 1687.33789   | 92.4827 |
| 2      | 13.367        | MM T | 0.2293      | 1816.37939   | 131.99971    | 7.5173  |

Totals : 2.41626e4 1819.33760

From the aldehyde oxidation level:

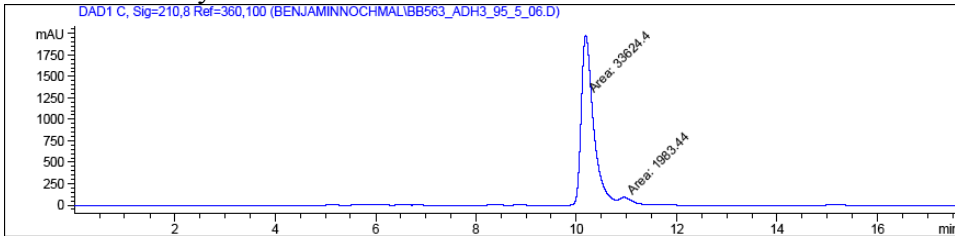

Signal 1: DAD1 C, Sig=210,8 Ref=360,100

| Peak # | RetTime [min] | Type | Width [min] | Area [mAU*s] | Height [mAU] | Area %  |
|--------|---------------|------|-------------|--------------|--------------|---------|
| 1      | 10.186        | MM T | 0.2826      | 3.36244e4    | 1982.71423   | 94.4298 |
| 2      | 10.953        | MM T | 0.3379      | 1983.43518   | 92.30791     | 5.5702  |

**(R)-1-(5-(3-chloro-4-methoxyphenyl)furan-2-yl)-2,2-dimethylbut-3-en-1-ol (5c)**

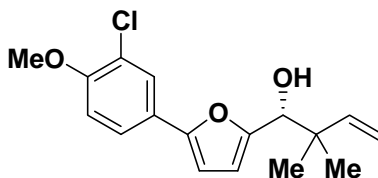

**Procedure E (via alcohol 1b):** The reaction was conducted on 0.2 mmol scale with respect to alcohol. The reaction mixture was concentrated *in vacuo* and purified by flash column chromatography (SiO<sub>2</sub>, hexane:EtOAc, 3:1) to afford the title compound (56.0 mg, 91% yield, 85% ee) as a colorless oil.

**Procedure F (via aldehyde 2b):** The reaction was conducted on 0.2 mmol scale with respect to aldehyde. The reaction mixture was concentrated *in vacuo* and purified by flash column chromatography (SiO<sub>2</sub>, hexane:EtOAc, 3:1) to afford the title compound (57.7 mg, 94% yield, 93% ee) as a colorless oil.

**TLC** (SiO<sub>2</sub>): R<sub>f</sub>(Hexane:Et<sub>2</sub>O, 3:1) = 0.25.

**<sup>1</sup>H NMR** (400 MHz, CDCl<sub>3</sub>): 7.60 (d, *J* = 2.2 Hz, 1H), 7.45 (dd, *J* = 8.6, 2.3, Hz, 1H), 6.90 (d, *J* = 8.6 Hz, 1H), 6.46 (d, *J* = 3.3 Hz, 1H), 6.27 (d, *J* = 3.2 Hz, 1H), 5.95 (dd, *J* = 17.4, 10.8 Hz, 1H), 5.15 (dd, *J* = 10.6, 1.2 Hz, 1H), 5.11 (dd, *J* = 17.4, 1.2 Hz, 1H), 4.43 (s, 1H), 3.89 (s, 3H), 2.10 (s, 1H), 1.10 (s, 3H), 1.06 (s, 3H).

**<sup>13</sup>C NMR** (100 MHz, CDCl<sub>3</sub>): 154.4, 154.3, 151.8, 144.4, 125.8, 124.9, 123.3, 123.0, 114.3, 112.4, 109.9, 105.0, 75.2, 56.4, 42.3, 24.1, 22.4.

**HRMS** (CI): Calcd. for C<sub>17</sub>H<sub>18</sub>O<sub>2</sub><sup>35</sup>Cl (M-OH)<sup>+</sup>: 289.0995, Found: 289.0999.

**FTIR** (film): 3447, 2965, 1544, 1489, 1266, 1018, 811, 708 cm<sup>-1</sup>.

**Opt. Rot.** [α]<sub>D</sub><sup>26</sup> = +51.0 (c = 1.00, in CHCl<sub>3</sub>).

**HPLC** (Chiralcel AD-H column, hexane:*i*-PrOH, 98:2, 0.8 mL/min, 210 nm): t<sub>minor</sub> = 40.5 min, t<sub>major</sub> = 41.9 min.



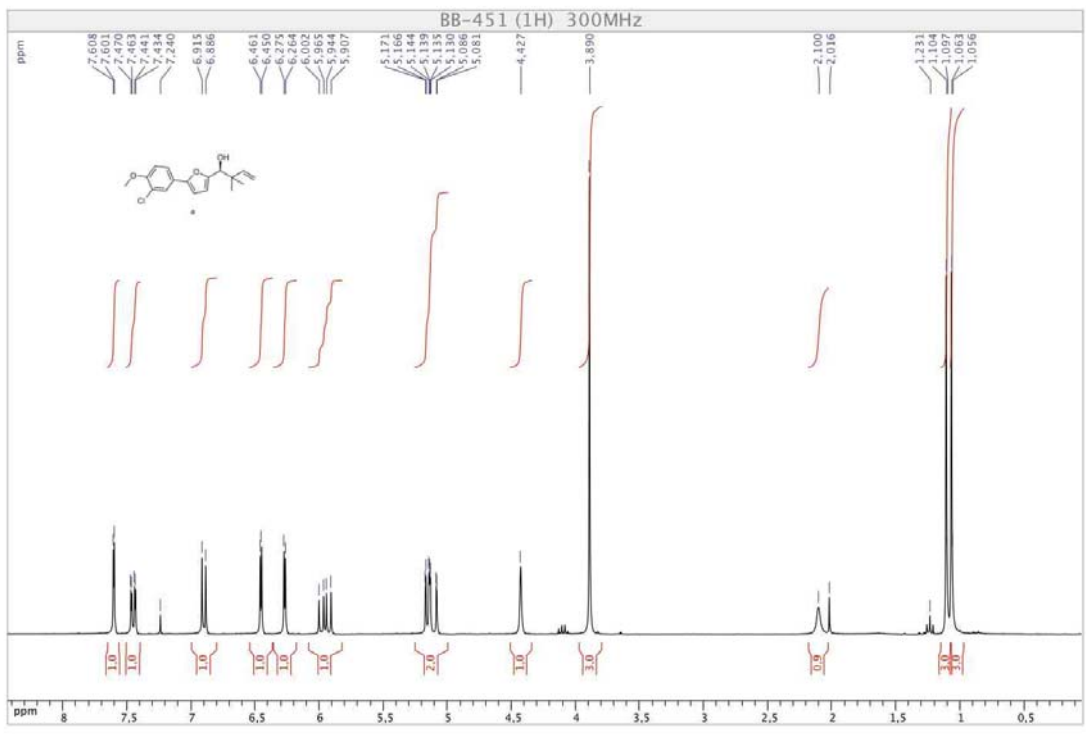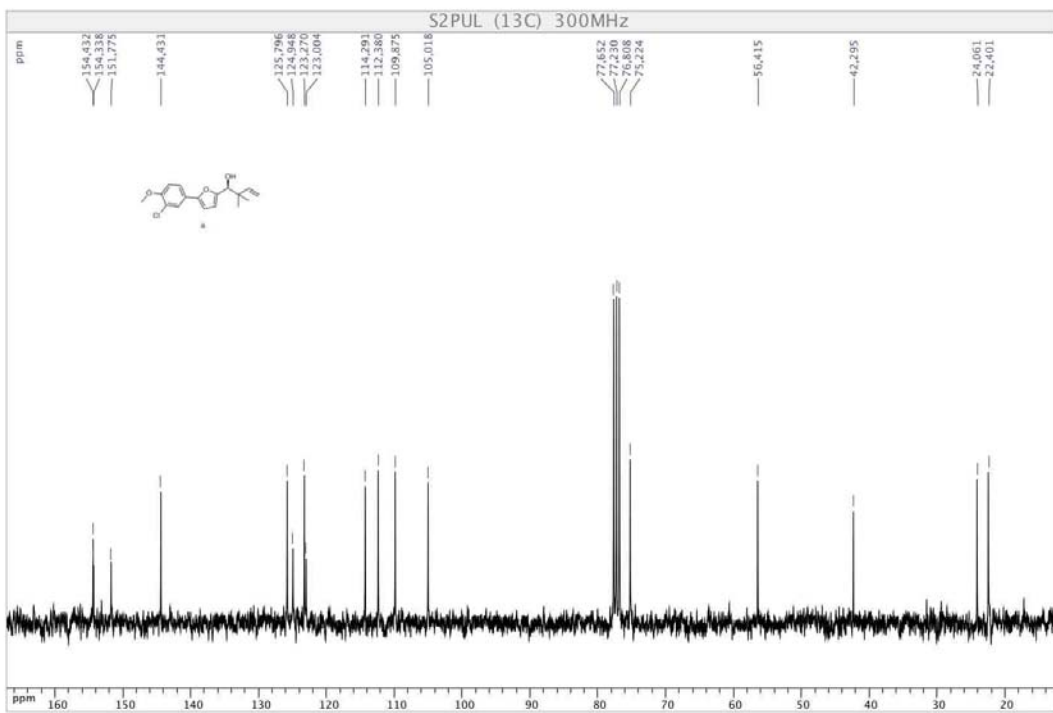

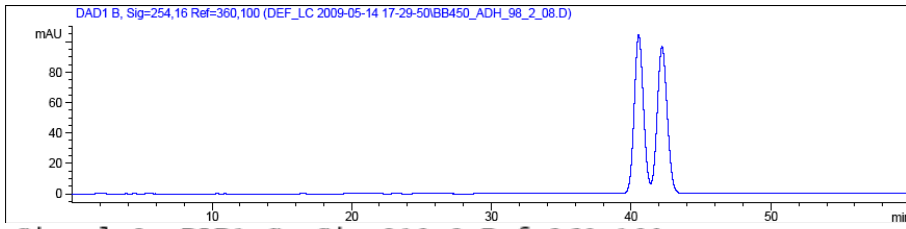

Signal 2: DAD1 C, Sig=210,8 Ref=360,100

| Peak # | RetTime [min] | Type | Width [min] | Area [mAU*s] | Height [mAU] | Area %  |
|--------|---------------|------|-------------|--------------|--------------|---------|
| 1      | 40.520        | MM T | 0.9266      | 1.77167e4    | 403.86667    | 50.2041 |
| 2      | 42.193        | MM T | 0.7889      | 1.75726e4    | 371.23380    | 49.7959 |

From the alcohol oxidation level:

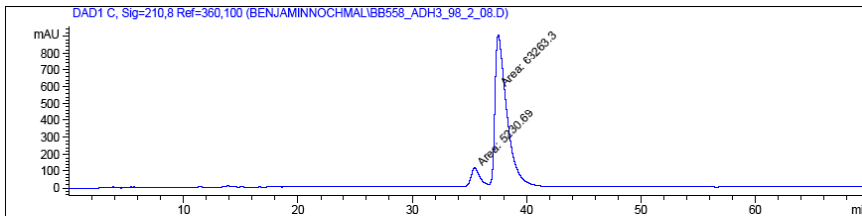

Signal 1: DAD1 C, Sig=210,8 Ref=360,100

| Peak # | RetTime [min] | Type | Width [min] | Area [mAU*s] | Height [mAU] | Area %  |
|--------|---------------|------|-------------|--------------|--------------|---------|
| 1      | 35.450        | MM T | 0.9697      | 5230.69141   | 105.65318    | 7.6367  |
| 2      | 37.507        | MM T | 1.1860      | 6.32633e4    | 889.02063    | 92.3633 |

From the aldehyde oxidation level:

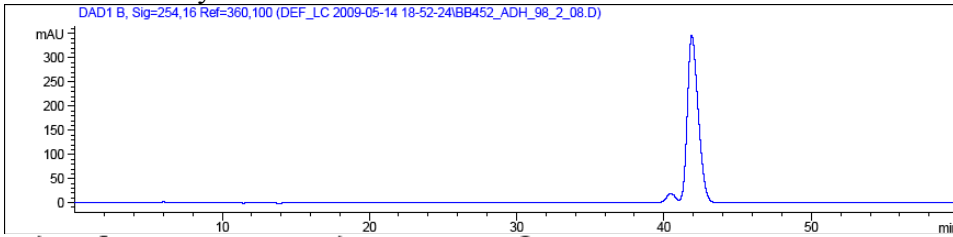

Signal 2: DAD1 C, Sig=210,8 Ref=360,100

| Peak # | RetTime [min] | Type | Width [min] | Area [mAU*s] | Height [mAU] | Area %  |
|--------|---------------|------|-------------|--------------|--------------|---------|
| 1      | 40.451        | MM R | 0.6332      | 2377.83350   | 62.58628     | 3.3579  |
| 2      | 41.879        | MM T | 0.8622      | 6.84343e4    | 1322.93689   | 96.6421 |

**(R)-2-allyl-6-hydroxy-6-methyl-2H-pyran-3(6H)-one (6a)**

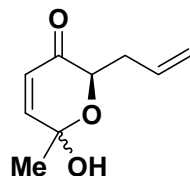

**Procedure G (via alcohol (R)-3b):** The reaction was conducted on 0.329 mmol scale with respect to alcohol. The crude product purified by flash column chromatography (SiO<sub>2</sub>: hexane:Et<sub>2</sub>O, 2:1) to furnish the title compound (41.5 mg, 75% yield, 94% ee) as a colorless oil.

**TLC** (SiO<sub>2</sub>): R<sub>f</sub> (Pet. Ether:Et<sub>2</sub>O, 2:1) = 0.10.

**<sup>1</sup>H NMR** (400 MHz, CDCl<sub>3</sub>): 6.79 (d, *J* = 10.1 Hz, 1H), 5.99 (d, *J* = 10.0 Hz, 1H), 5.81 (tdd, *J* = 17.2, 10.2, 6.8 Hz, 1H), 5.12 (dd, *J* = 17.1, 2.0 Hz, 1H), 5.05 (dd, *J* = 10.1, 1.8 Hz, 1H), 4.56 (dd, *J* = 7.7, 3.9 Hz, 1H), 2.84 (s, 1H), 2.67 (m, 1H), 2.42 (m, *J* = 7.5 Hz, 1H), 1.61 (s, 3H).

**<sup>13</sup>C NMR** (100 MHz, CDCl<sub>3</sub>): 196.4, 148.1, 134.0, 126.6, 117.7, 93.1, 74.2, 34.1, 29.1.

**HRMS** (CI): Calcd. for C<sub>9</sub>H<sub>12</sub>O<sub>3</sub> (M+H)<sup>+</sup>: 169.0865, Found: 169.0868.

**FTIR** (neat): 3392, 3075, 2989, 2917, 1687, 1643, 1402, 1378, 1270, 1123, 1083, 995, 920, 736 cm<sup>-1</sup>.

**HPLC** (Chiralcel AD-H column, hexane:*i*-PrOH, 98:2, 1.0 mL/min, 210 nm): *t*<sub>major</sub>=24.7 min, *t*<sub>minor</sub>=27.3 min.

*The spectroscopic properties of this compound are consistent with the data available in the literature.*<sup>8</sup>

<sup>8</sup> G. Piancatelli, A. Scettri, M. D'Auria, *Tet. Lett.* **1977**, 18, 2199–2200.

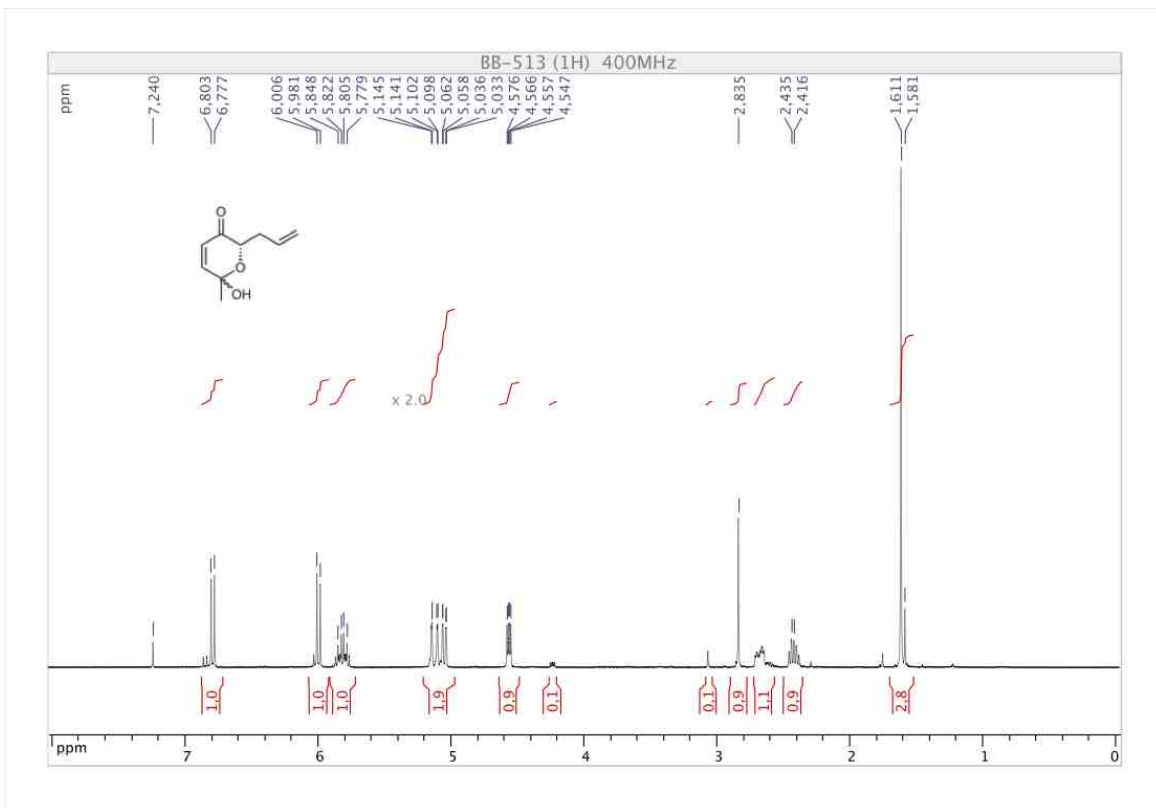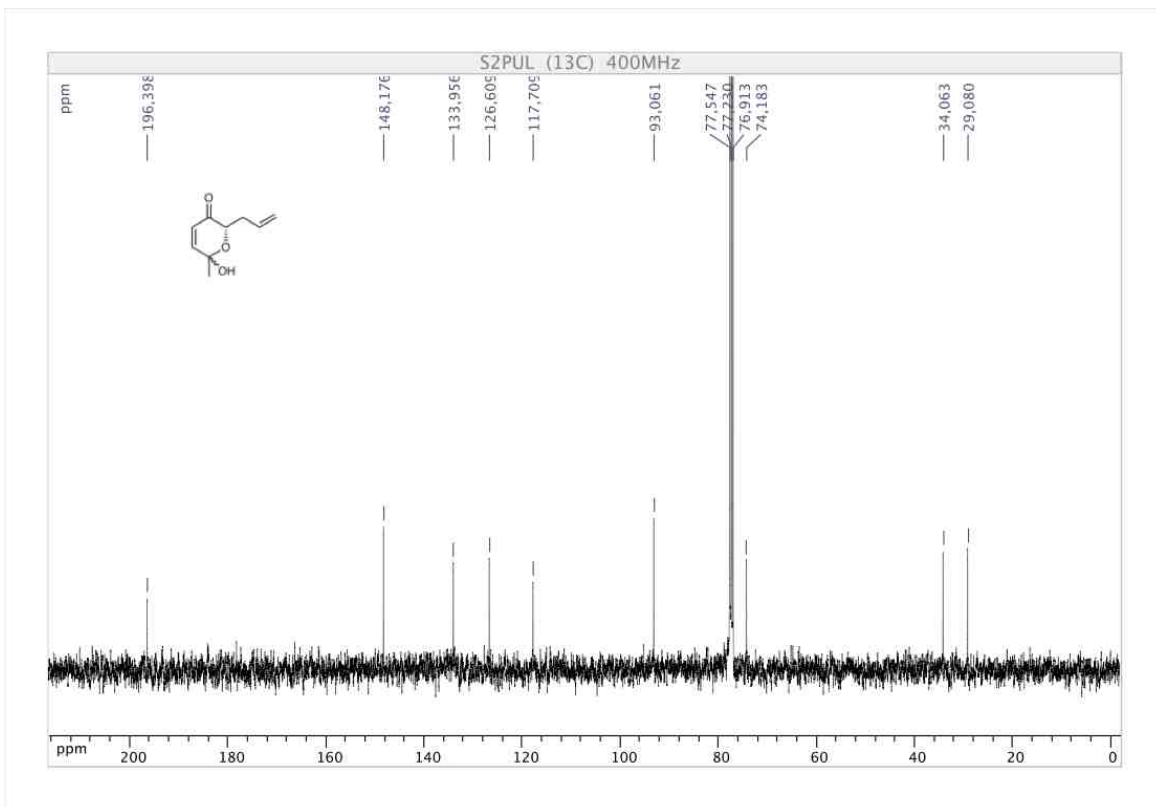

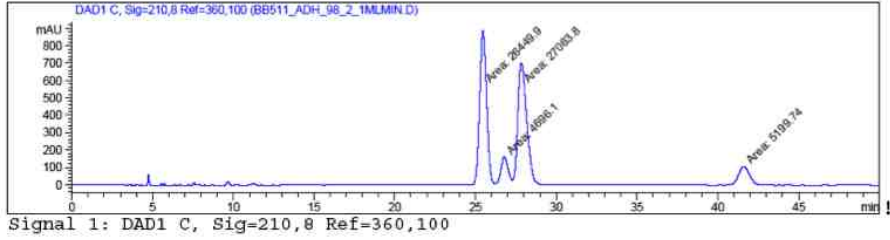

| Peak # | RetTime [min] | Type | Width [min] | Area [mAU*s] | Height [mAU] | Area %  |
|--------|---------------|------|-------------|--------------|--------------|---------|
| 1      | 25.448        | MM T | 0.4958      | 2.64499e4    | 889.19482    | 41.7128 |
| 2      | 26.768        | MM T | 0.5013      | 4696.10303   | 156.13420    | 7.4060  |
| 3      | 27.821        | MM T | 0.6401      | 2.70638e4    | 704.63013    | 42.6809 |
| 4      | 41.596        | MM T | 0.7954      | 5199.73682   | 108.95217    | 8.2002  |

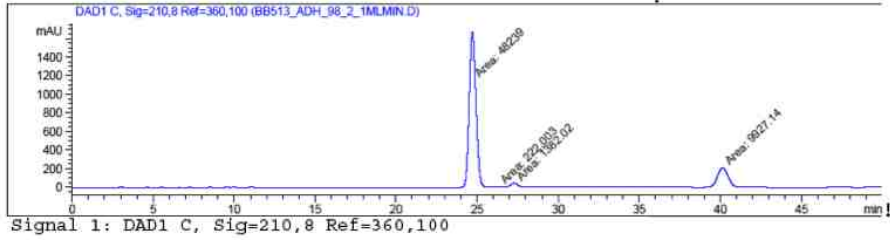

| Peak # | RetTime [min] | Type | Width [min] | Area [mAU*s] | Height [mAU] | Area %  |
|--------|---------------|------|-------------|--------------|--------------|---------|
| 1      | 24.694        | MM T | 0.4810      | 4.82390e4    | 1671.64160   | 80.7075 |
| 2      | 26.279        | MM T | 0.5415      | 222.00323    | 8.28000      | 0.3714  |
| 3      | 27.272        | MM T | 0.5102      | 1382.02478   | 45.14209     | 2.3122  |
| 4      | 40.122        | MM T | 0.7764      | 9927.13965   | 213.09850    | 16.6089 |

**(S)-2-((S)-but-3-en-2-yl)-6-hydroxy-6-methyl-2H-pyran-3(6H)-one (6b)**

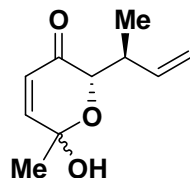

**Procedure G (via alcohol (S,S)-4b):** The reaction was conducted on 1.23 mmol scale with respect to alcohol. The crude product purified by flash column chromatography (SiO<sub>2</sub>, hexane:Et<sub>2</sub>O, 2:1) to afford the title compound (166 mg, 74% yield, 82% ee) as a colorless oil.

**TLC** (SiO<sub>2</sub>): R<sub>f</sub> (Pet. Ether:Et<sub>2</sub>O, 2:1) = 0.27.

**<sup>1</sup>H NMR** (400 MHz, CDCl<sub>3</sub>): 6.78 (d, *J* = 10.1 Hz, 1H), 5.95 (d, *J* = 10.1 Hz, 1H), 5.74 (ddd, *J* = 17.4, 10.4, 7.7 Hz, 1H), 4.97 (m, 2H), 4.40 (d, *J* = 2.8 Hz, 1H), 3.12 (s, 1H), 2.95 (m, 1H), 1.60 (s, 3H), 1.11 (d, *J* = 7.1 Hz, 3H).

**<sup>13</sup>C NMR** (100 MHz, CDCl<sub>3</sub>): 196.6, 148.3, 138.7, 127.0, 116.0, 92.8, 78.3, 38.5, 28.8, 16.9.

**HRMS** (CI): Calcd. for C<sub>10</sub>H<sub>15</sub>O<sub>3</sub> (M+H)<sup>+</sup>: 183.1021, Found: 183.1024.

**FTIR** (neat): 3393, 3078, 2981, 2936, 1683, 1639, 1454, 1403, 1376, 1278, 1235, 1124, 1092, 1028, 998, 914, 778 cm<sup>-1</sup>.

**HPLC** (Chiralcel OJ-H column, Hexane:*i*-PrOH, 97:3, 0.5 mL/min, 210 nm): *t*<sub>major</sub> = 20.6 min, *t*<sub>minor</sub> = 26.4 min.

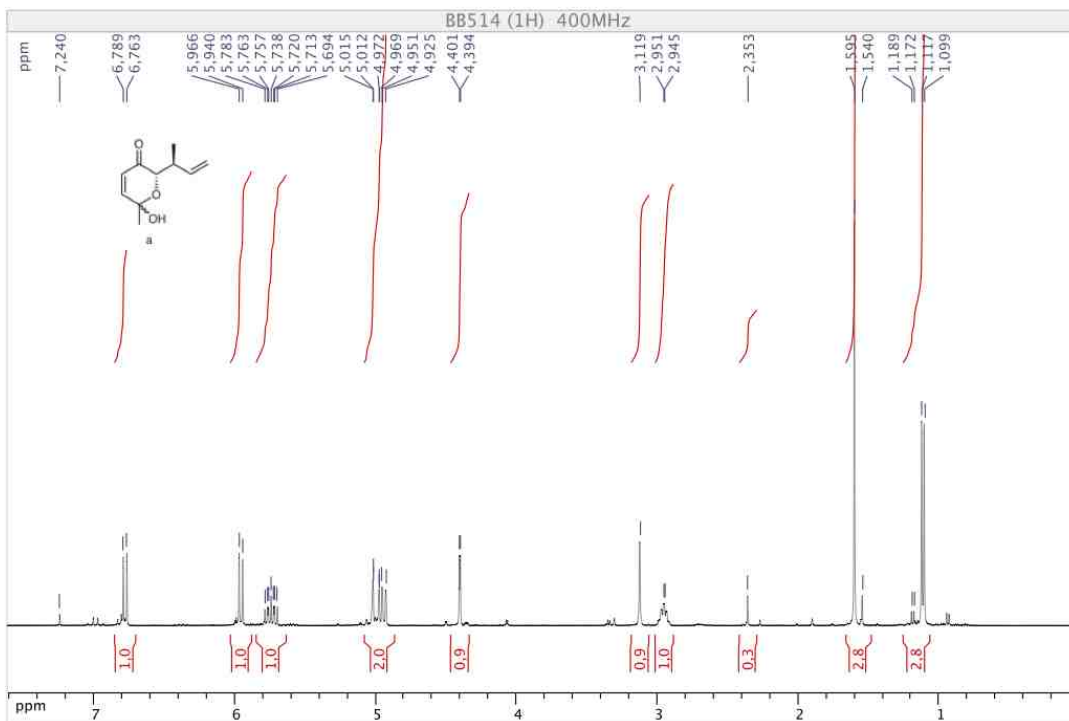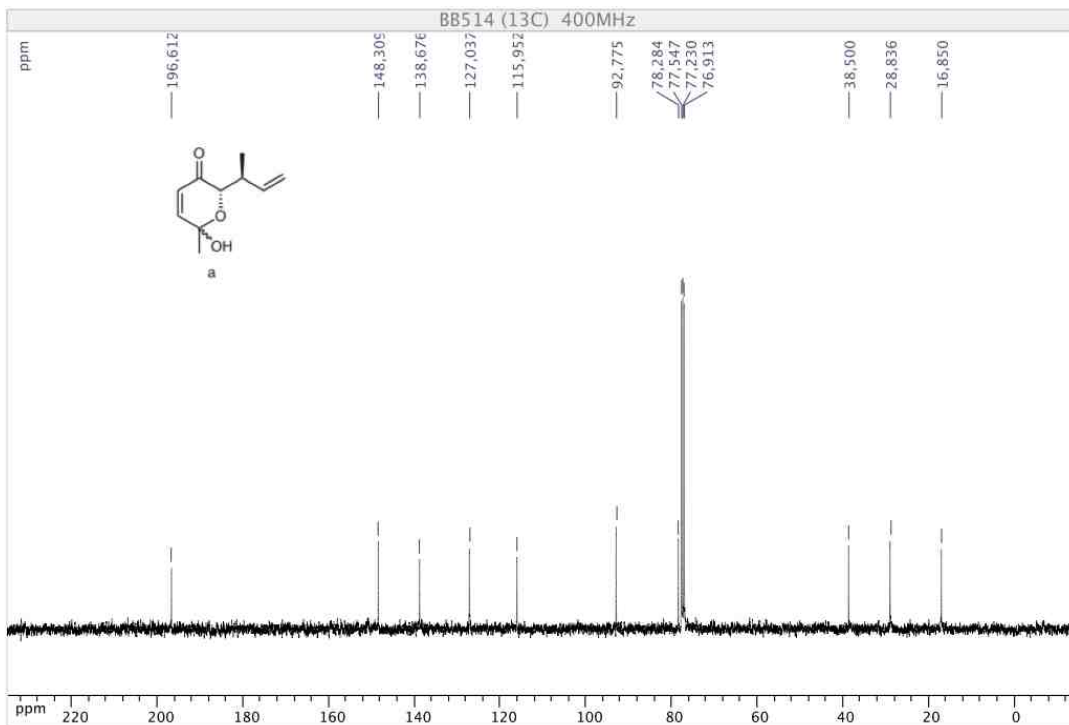

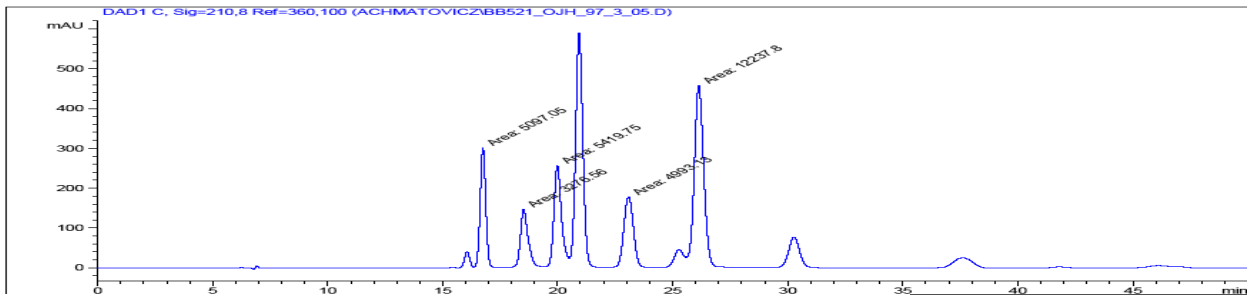

Signal 1: DAD1 C, Sig=210,8 Ref=360,100

| Peak # | RetTime [min] | Type | Width [min] | Area [mAU*s] | Height [mAU] | Area %  |
|--------|---------------|------|-------------|--------------|--------------|---------|
| 1      | 16.737        | MM T | 0.2816      | 5097.04590   | 301.67883    | 11.7546 |
| 2      | 18.510        | MM T | 0.3776      | 3276.55591   | 144.62331    | 7.5563  |
| 3      | 19.969        | MM T | 0.3641      | 5419.75342   | 248.08441    | 12.4988 |
| 4      | 20.918        | MM R | 0.3559      | 1.23377e4    | 577.78363    | 28.4529 |
| 5      | 23.069        | MM T | 0.4733      | 4993.12646   | 175.84109    | 11.5150 |
| 6      | 26.120        | MM T | 0.4612      | 1.22378e4    | 442.28876    | 28.2224 |

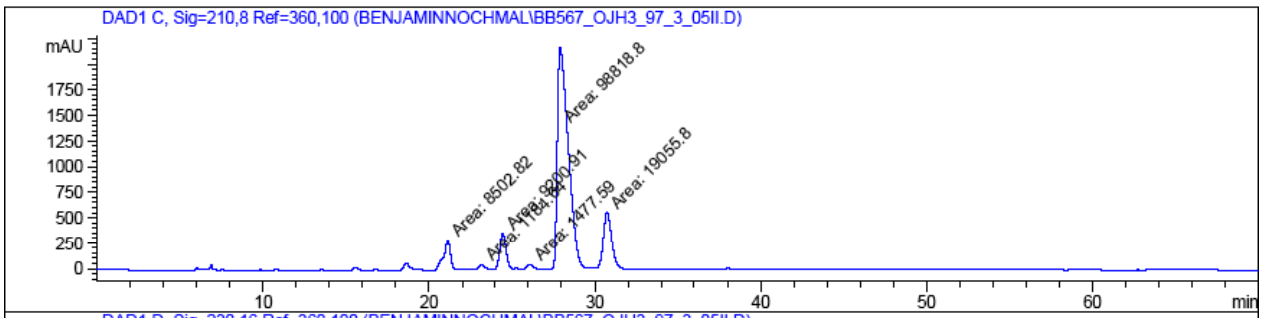

Signal 1: DAD1 C, Sig=210,8 Ref=360,100

| Peak # | RetTime [min] | Type | Width [min] | Area [mAU*s] | Height [mAU] | Area %  |
|--------|---------------|------|-------------|--------------|--------------|---------|
| 1      | 21.120        | MM T | 0.4893      | 8502.81934   | 289.62146    | 6.1507  |
| 2      | 23.189        | MM T | 0.4153      | 1184.64026   | 47.54165     | 0.8569  |
| 3      | 24.436        | MM T | 0.5486      | 9200.90820   | 355.30753    | 6.6557  |
| 4      | 26.103        | MM T | 0.4666      | 1477.59485   | 52.77736     | 1.0689  |
| 5      | 27.896        | MM T | 0.7629      | 9.88188e4    | 2158.84131   | 71.4832 |



**(R)-6-hydroxy-6-methyl-2-(2-methylbut-3-en-2-yl)-2H-pyran-3(6H)-one (6c)**

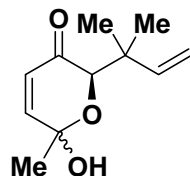

**Procedure G (via alcohol (R)-5b):** The reaction was conducted on 0.201 mmol scale with respect to alcohol. The crude product purified by flash column chromatography (SiO<sub>2</sub>: hexane:Et<sub>2</sub>O, 2:1) to furnish the title compound (16.9 mg, 43% yield, 84% ee) as a colorless oil.

**TLC** (SiO<sub>2</sub>): R<sub>f</sub> (Pet. Ether:Et<sub>2</sub>O, 3:1) = 0.19.

**<sup>1</sup>H NMR** (400 MHz, CDCl<sub>3</sub>): 6.71 (d, *J* = 10.1 Hz, 1H), 6.01 (dd, *J* = 17.6, 10.8 Hz, 1H), 5.91 (d, *J* = 10.1 Hz, 1H), 4.97 (m, 2H), 4.22 (s, 1H), 2.59 (s, 1H), 1.60 (s, 3H), 1.16 (s, 3H), 1.12 (s, 3H).

**<sup>13</sup>C NMR** (100 MHz, CDCl<sub>3</sub>): 196.3, 146.8, 145.0, 128.2, 112.0, 93.1, 80.0, 40.4, 29.0, 24.1, 23.8.

**HRMS** (CI): Calcd. for C<sub>11</sub>H<sub>17</sub>O<sub>3</sub> (M+H)<sup>+</sup>: 197.1178, Found: 197.1178.

**FTIR** (neat): 3396, 3084, 2986, 2967, 1684, 1638, 1465, 1414, 1378, 1362, 1256, 1127, 1093, 1067, 918 cm<sup>-1</sup>.

**HPLC** (Chiralcel AD-H column, Hexane:*i*-PrOH, 97:3, 0.5 mL/min, 210 nm): *t*<sub>minor</sub> = 14.8 min, *t*<sub>major</sub> = 25.1 min.

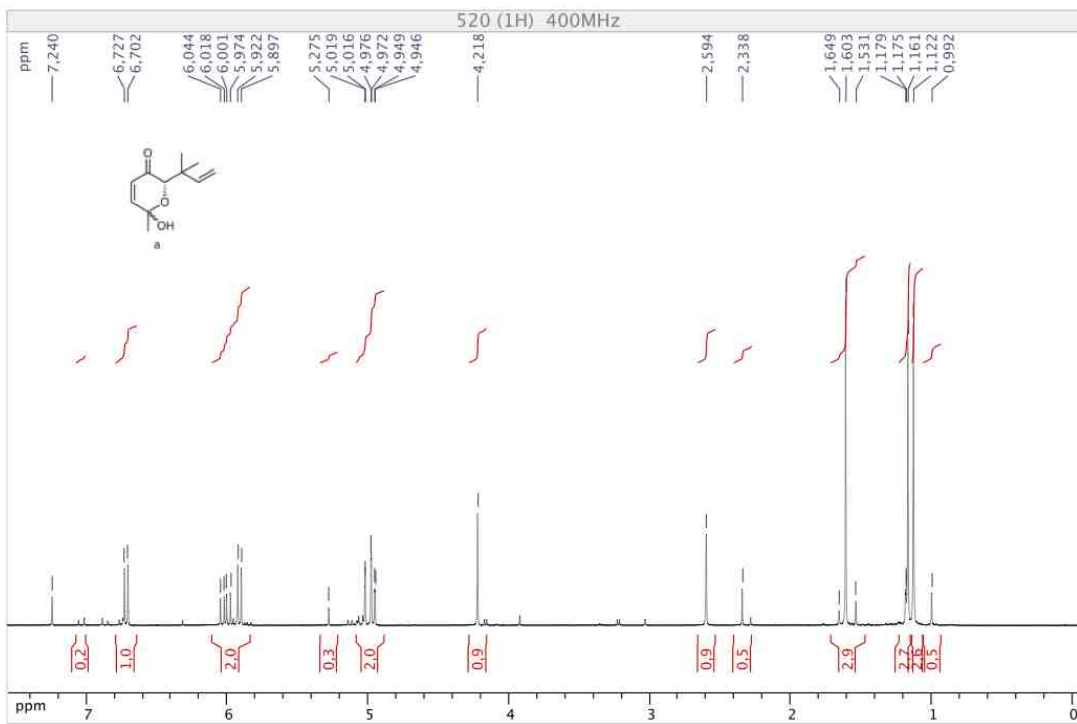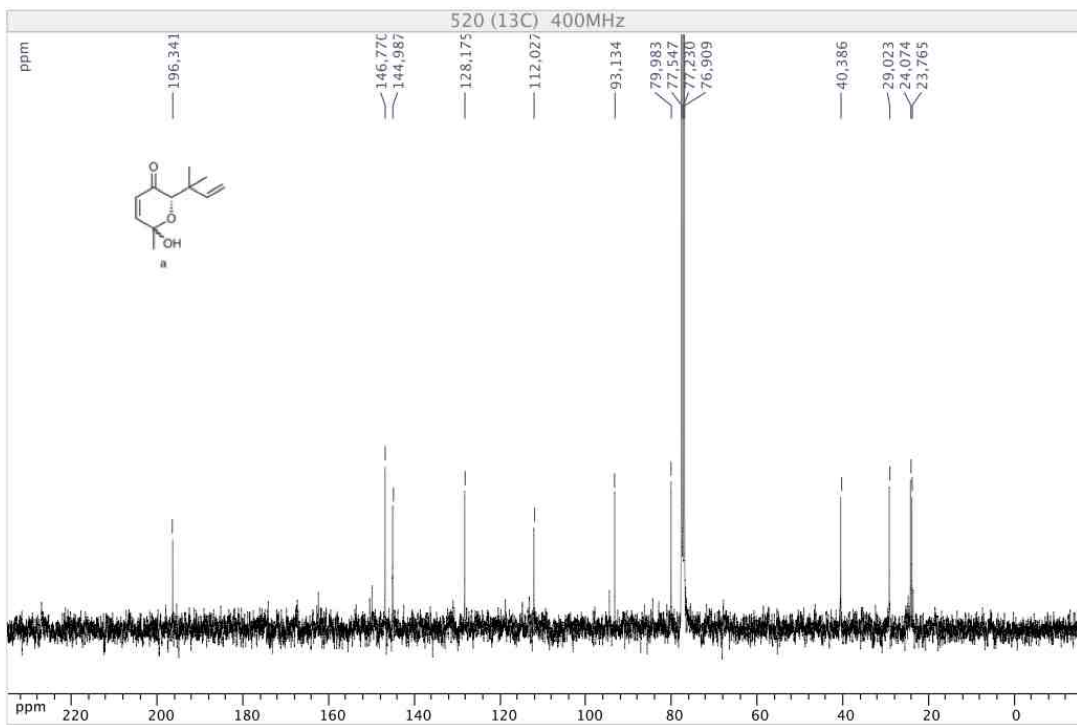

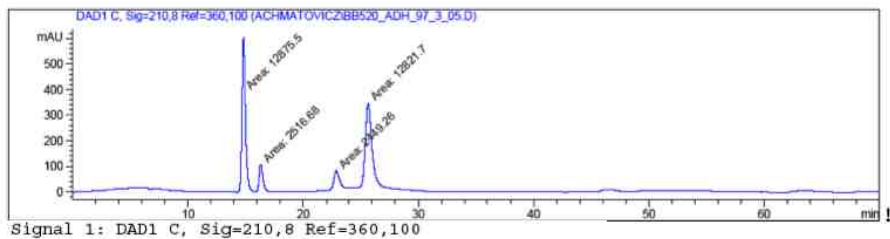

| Peak # | RetTime [min] | Type | Width [min] | Area [mAU*s] | Height [mAU] | Area %  |
|--------|---------------|------|-------------|--------------|--------------|---------|
| 1      | 14.806        | MM T | 0.3535      | 1.28755e4    | 607.07343    | 41.9901 |
| 2      | 16.318        | MM T | 0.4572      | 2516.68359   | 107.54316    | 8.2075  |
| 3      | 22.864        | MM T | 0.5634      | 2449.26294   | 72.46011     | 7.9876  |
| 4      | 25.627        | MM T | 0.6491      | 1.28217e4    | 329.21783    | 41.8148 |

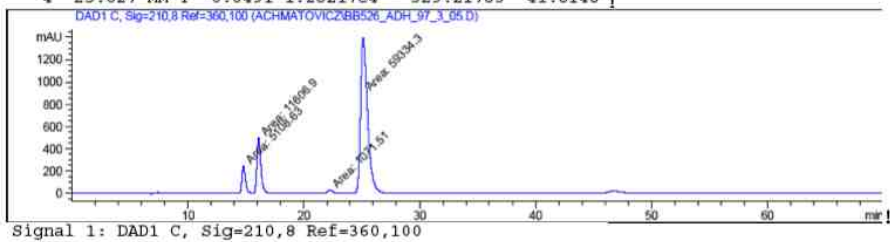

| Peak # | RetTime [min] | Type | Width [min] | Area [mAU*s] | Height [mAU] | Area %  |
|--------|---------------|------|-------------|--------------|--------------|---------|
| 1      | 14.768        | MM T | 0.3439      | 5108.62598   | 247.56685    | 6.6241  |
| 2      | 16.068        | MM T | 0.4671      | 1.16069e4    | 497.61237    | 15.0502 |
| 3      | 22.238        | MM T | 0.6044      | 1071.51416   | 29.54573     | 1.3894  |
| 4      | 25.110        | MM T | 0.7077      | 5.93343e4    | 1397.38623   | 76.9363 |
